# Supplementary material for: Construction of tetrahydropyranoquinoline derivativesviaan asymmetric organocatalytic aza-Michael-IED/HAD cascade reaction
Source: Royal Society of Chemistry journal article supplement (doi:10.1039/c7ob02231j), 2017-01-01
Supplement: c7ob02231j1.pdf [file c7ob02231j1.pdf]

## Supporting Information

### Highly Efficient Construction of Tetrahydropyranoquinoline Derivatives via an Asymmetric Organocatalytic aza-Michael-IED/HAD Cascade Reaction

Lu Dai, Yuxuan Hou, Lvyue Zhang, Zhangtao Chen, Xiaofei Zeng\* and Guofu Zhong\*

College of Material, Chemistry and Chemical Engineering, Hangzhou Normal  
University, Hangzhou 310036, China

E-mail: [chemzxf@hznu.edu.cn](mailto:chemzxf@hznu.edu.cn); [zgf@hznu.edu.cn](mailto:zgf@hznu.edu.cn)

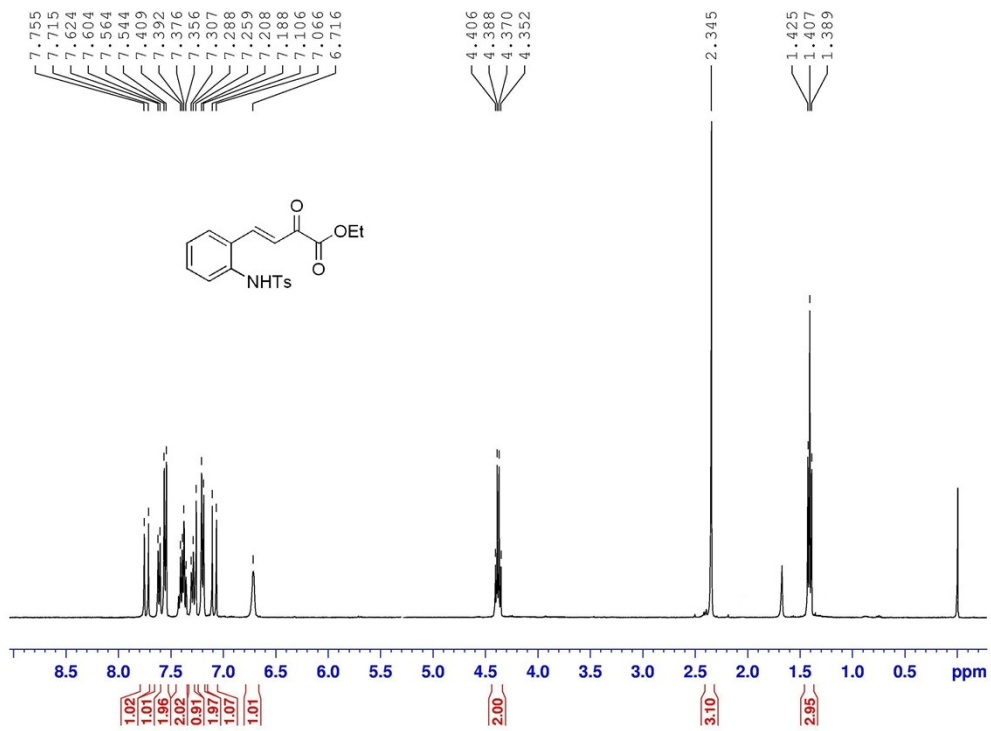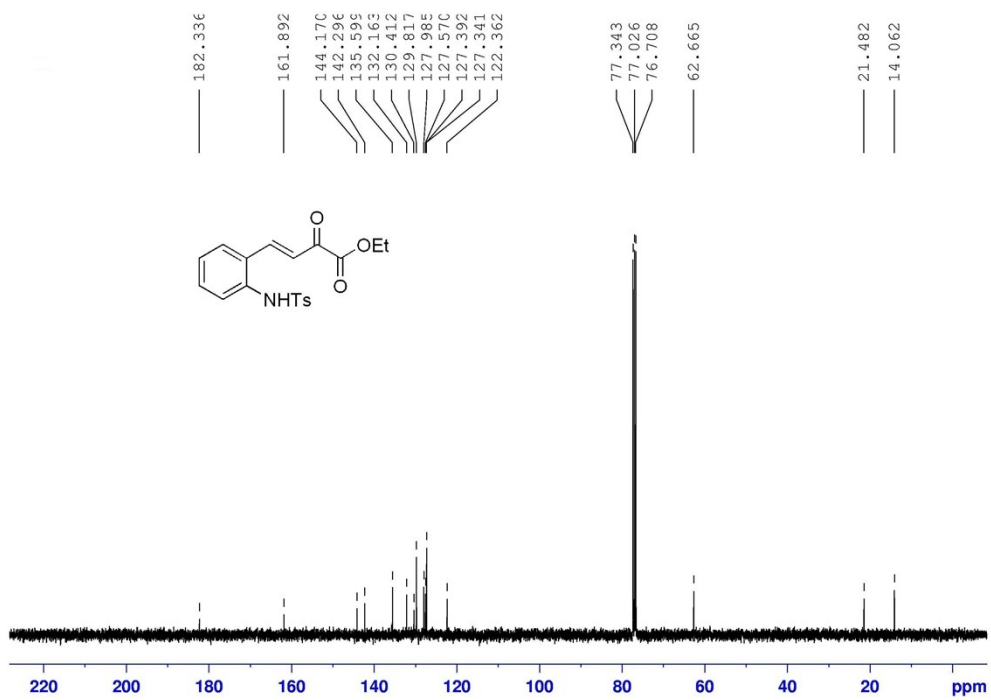

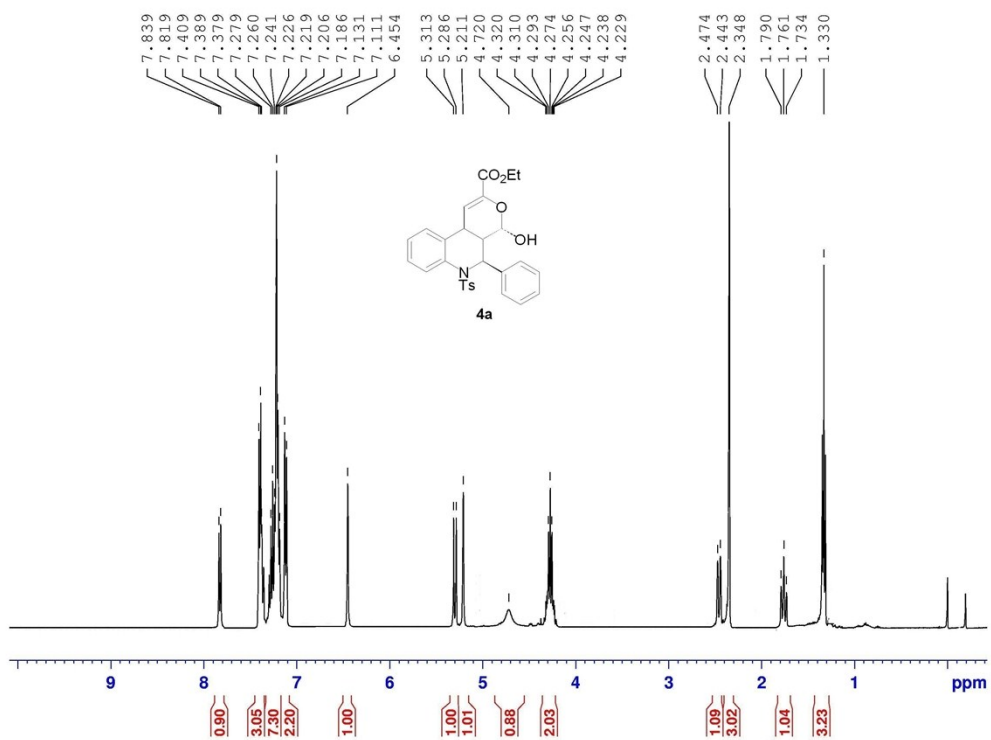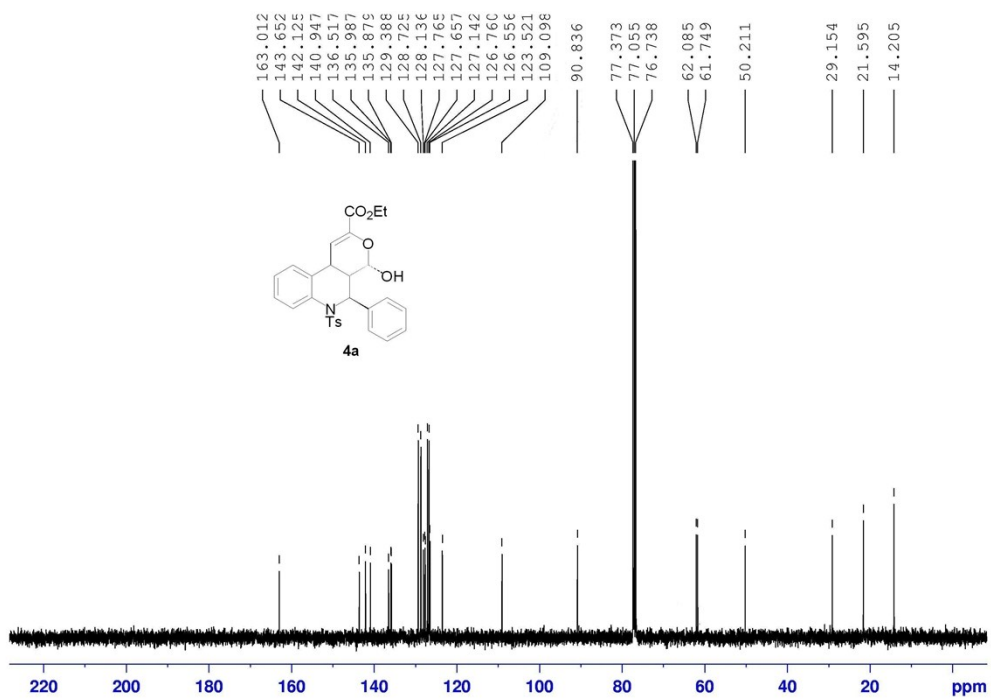

Chromatogram  
C:\LabSolutions\Data\DAL\DL810 85-15 ADH.lcd

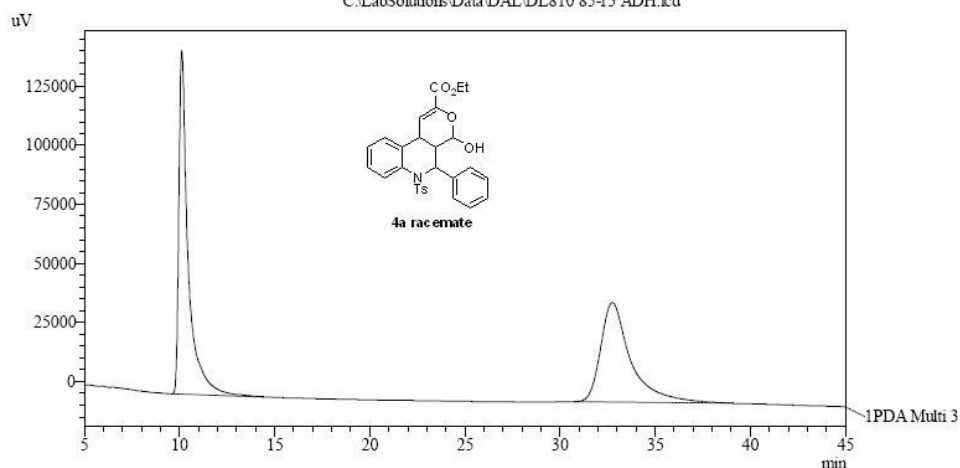

1 PDA Multi 3 / 254nm 4nm

PeakTable

PDA Ch3 254nm 4nm

| Peak# | Ret. Time | Area    | Height | Area %  |
|-------|-----------|---------|--------|---------|
| 1     | 10.116    | 4974380 | 145713 | 51.730  |
| 2     | 32.751    | 4641590 | 42209  | 48.270  |
| Total |           | 9615971 | 187923 | 100.000 |

Chromatogram  
C:\LabSolutions\Data\DAL\DL837 85-15 ADH.lcd

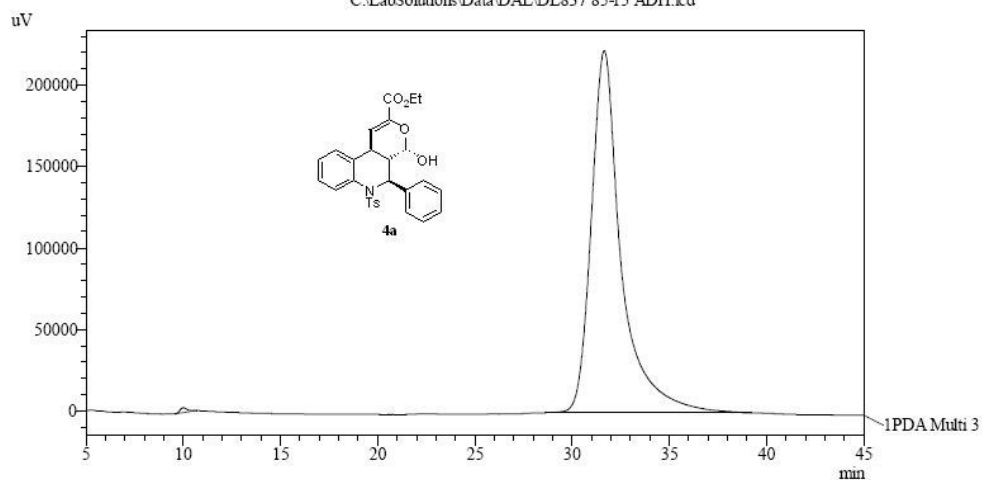

1 PDA Multi 3 / 254nm 4nm

PeakTable

PDA Ch3 254nm 4nm

| Peak# | Ret. Time | Area     | Height | Area %  |
|-------|-----------|----------|--------|---------|
| 1     | 10.005    | 85520    | 3028   | 0.357   |
| 2     | 31.653    | 23847259 | 222180 | 99.643  |
| Total |           | 23932780 | 225208 | 100.000 |

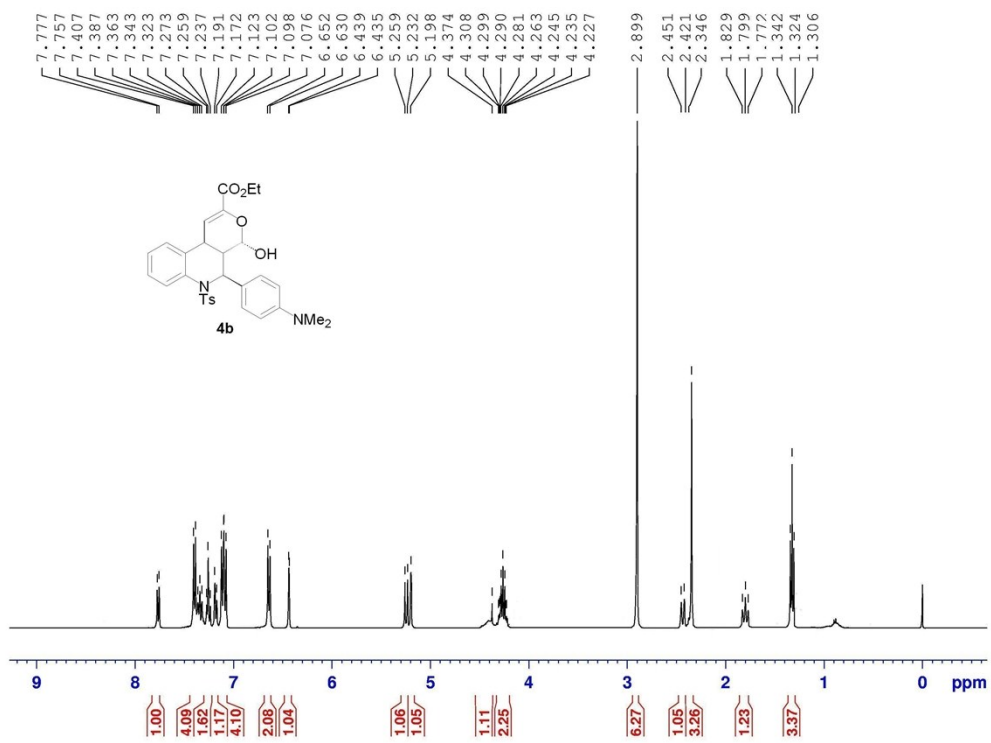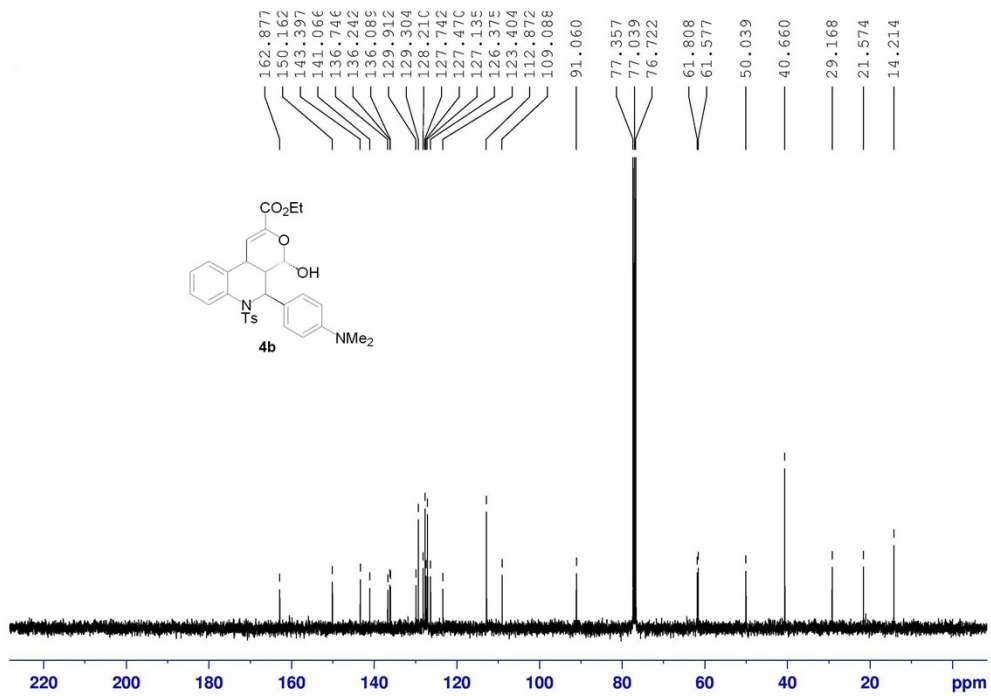

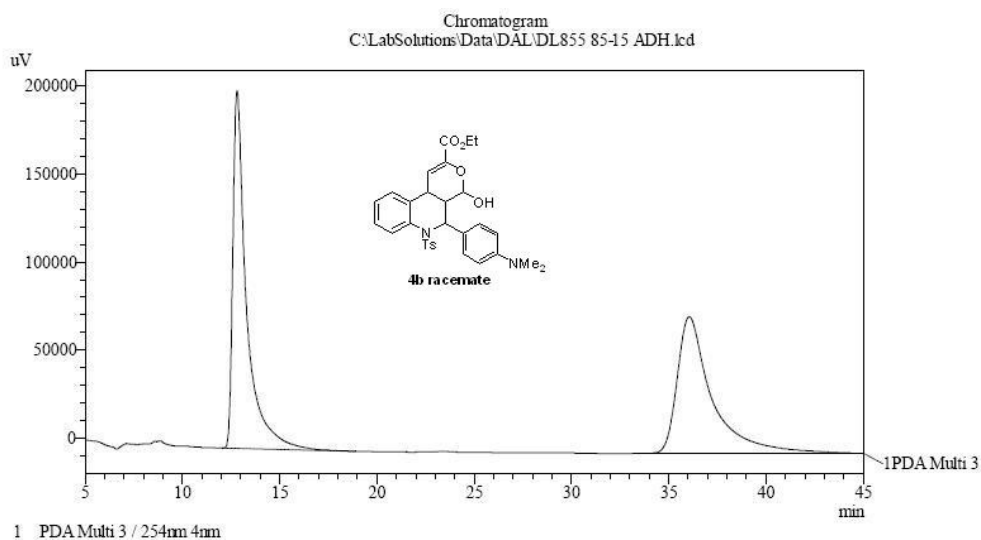

PeakTable

PDA Ch3 254nm 4nm

| Peak# | Ret. Time | Area     | Height | Area %  |
|-------|-----------|----------|--------|---------|
| 1     | 12.810    | 9948703  | 202925 | 50.950  |
| 2     | 36.058    | 9577542  | 77412  | 49.050  |
| Total |           | 19526245 | 280338 | 100.000 |

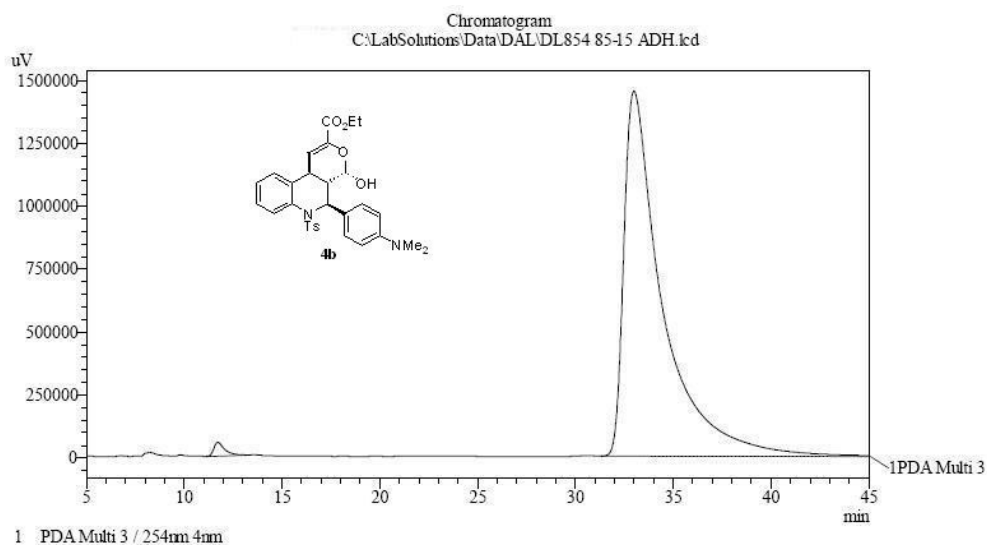

PeakTable

PDA Ch3 254nm 4nm

| Peak# | Ret. Time | Area      | Height  | Area %  |
|-------|-----------|-----------|---------|---------|
| 1     | 11.714    | 2112561   | 54298   | 1.048   |
| 2     | 32.991    | 199443427 | 1450841 | 98.952  |
| Total |           | 201555988 | 1505139 | 100.000 |

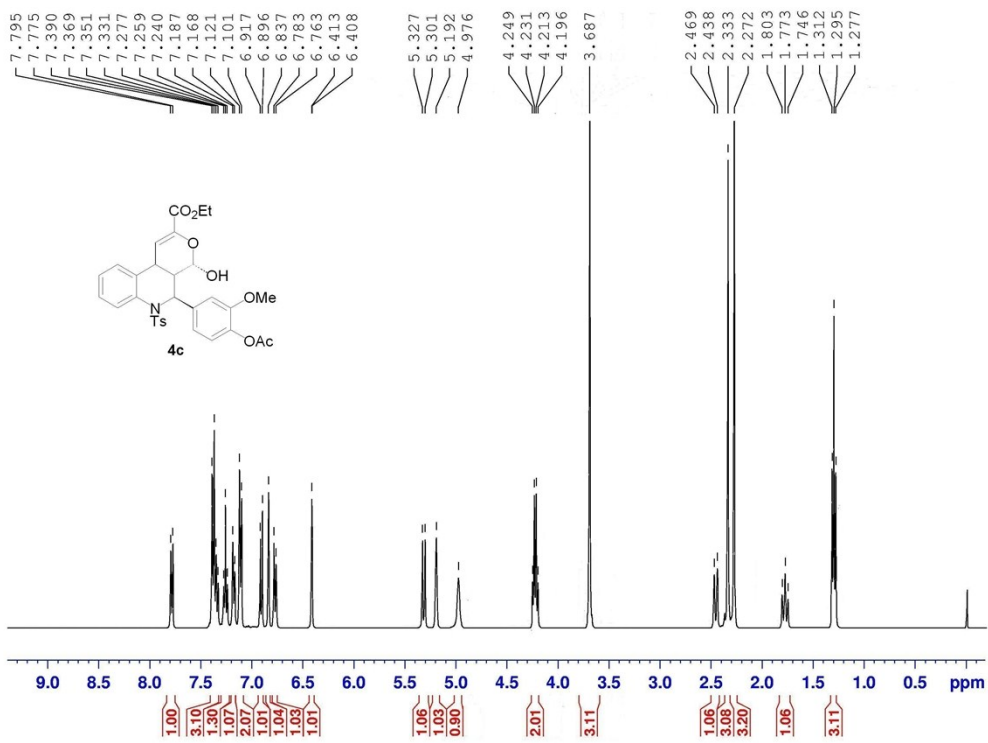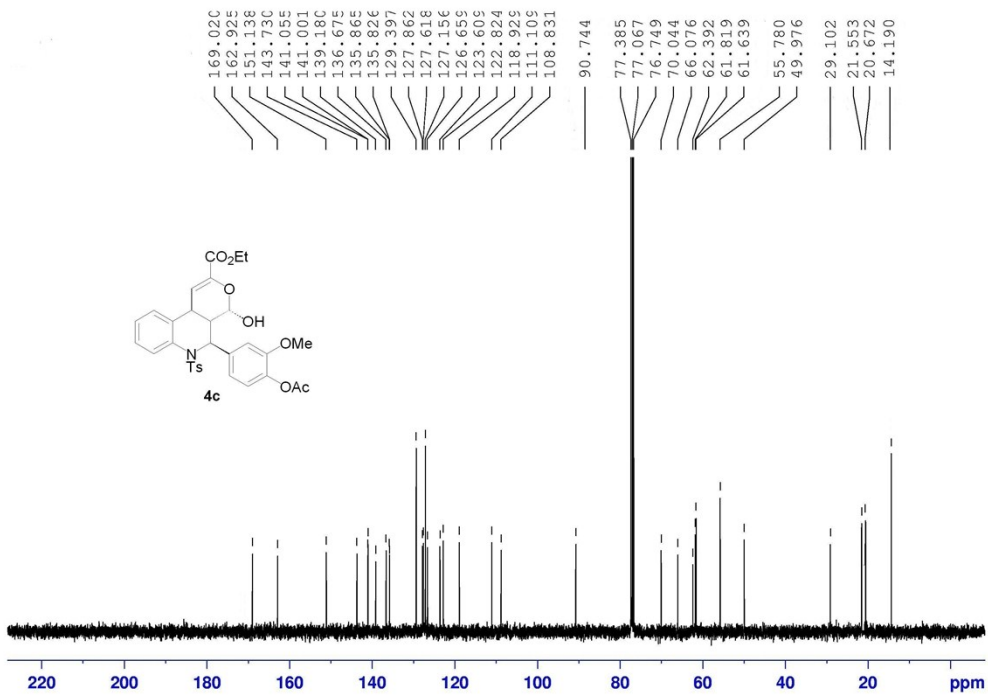

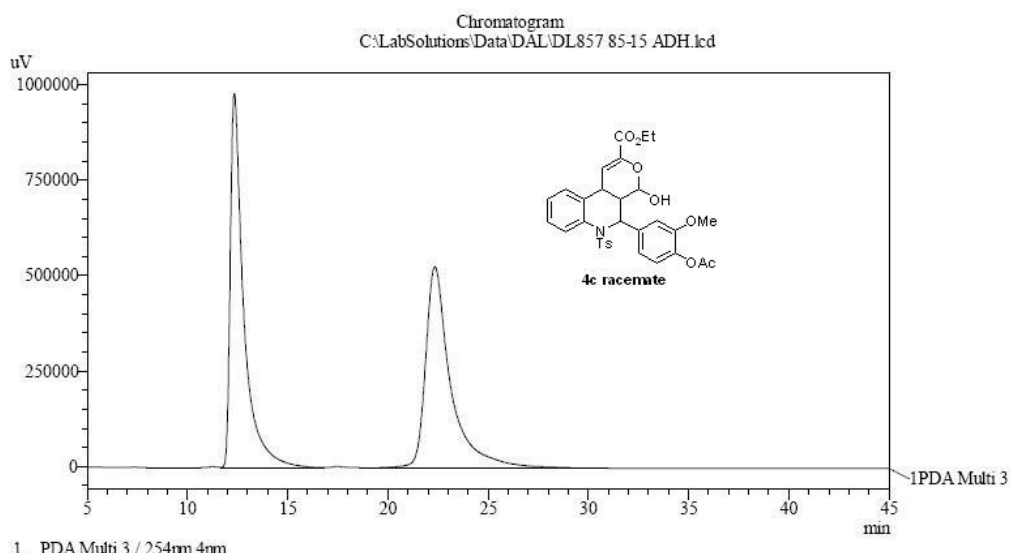

PeakTable

PDA Ch3 254nm 4nm

| Peak# | Ret. Time | Area     | Height  | Area %  |
|-------|-----------|----------|---------|---------|
| 1     | 12.338    | 45508270 | 979391  | 49.654  |
| 2     | 22.343    | 46142486 | 527571  | 50.346  |
| Total |           | 91650757 | 1506962 | 100.000 |

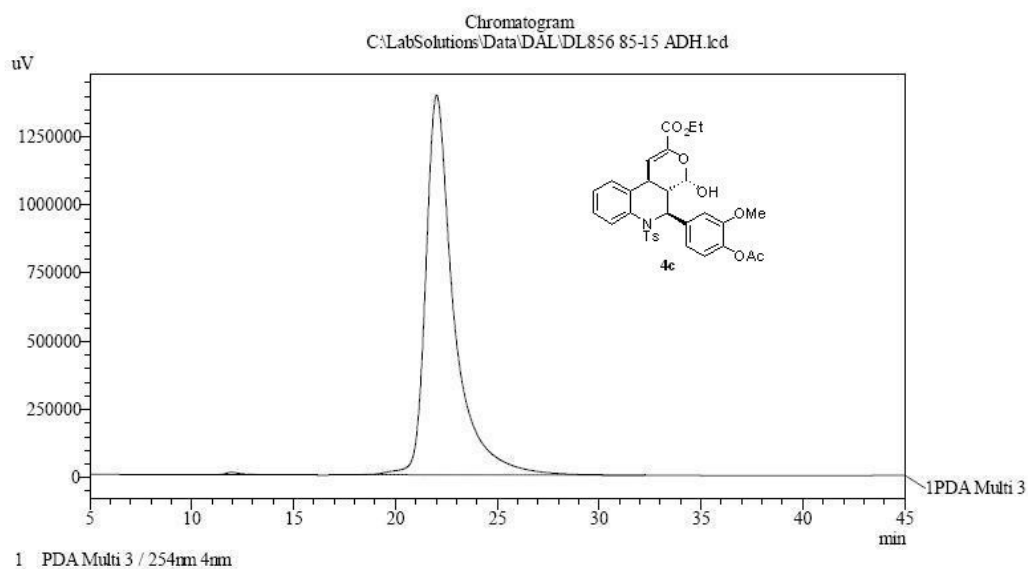

PeakTable

PDA Ch3 254nm 4nm

| Peak# | Ret. Time | Area      | Height  | Area %  |
|-------|-----------|-----------|---------|---------|
| 1     | 11.954    | 362627    | 8145    | 0.268   |
| 2     | 22.023    | 134788719 | 1392642 | 99.732  |
| Total |           | 135151346 | 1400787 | 100.000 |



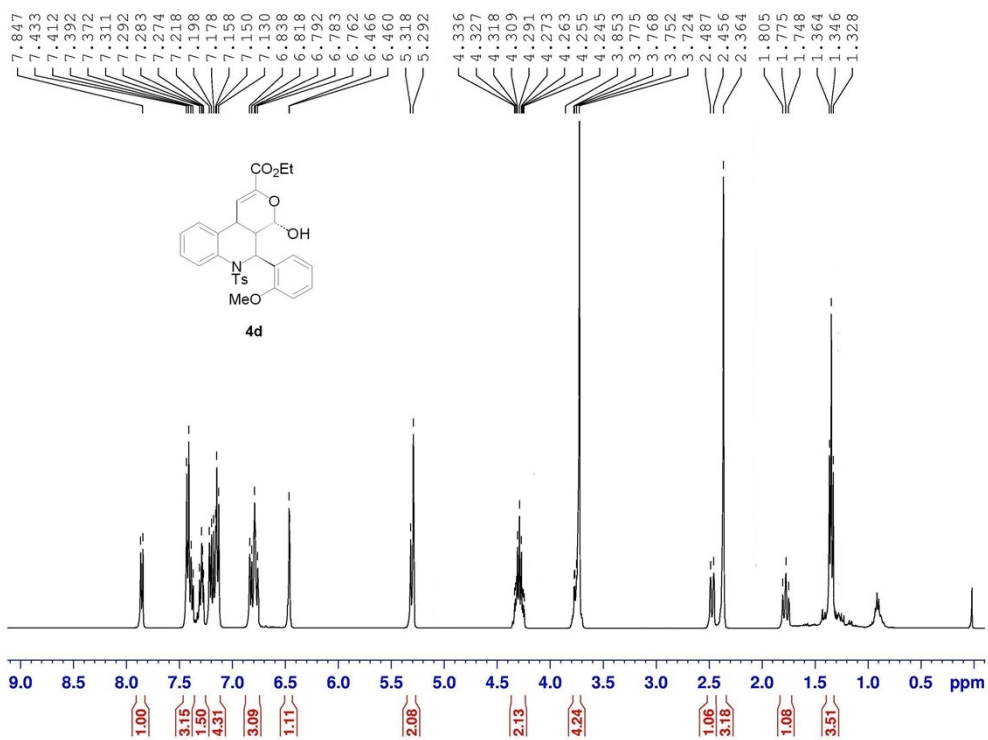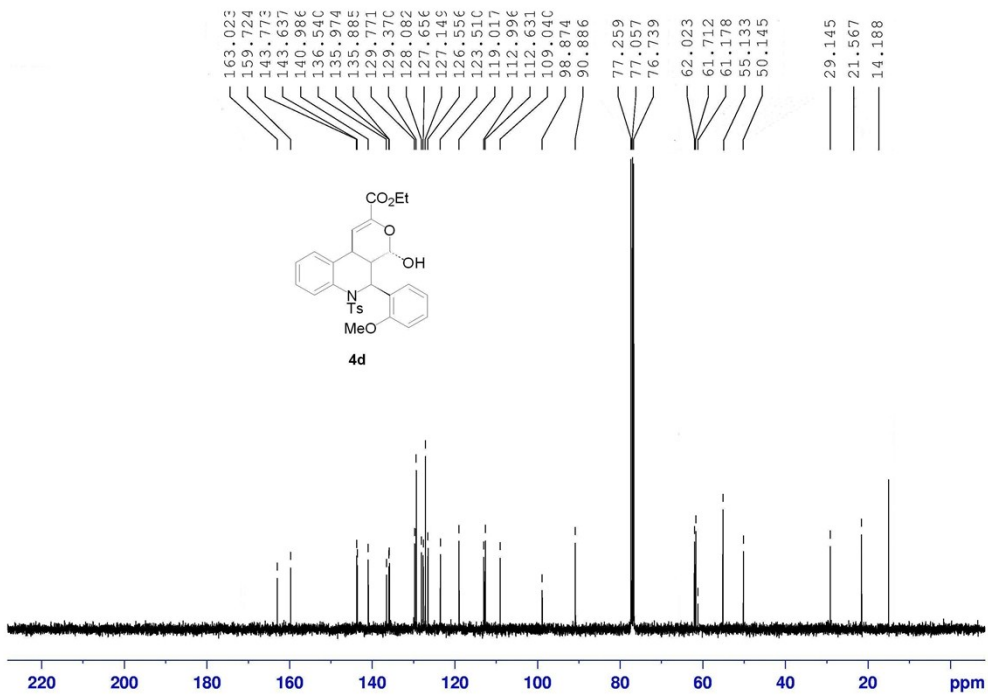

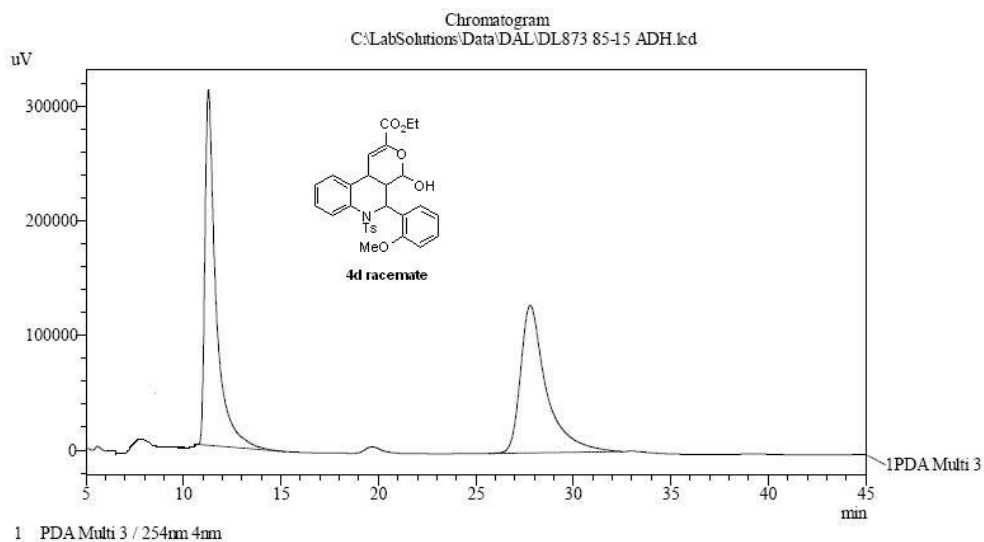

PeakTable

| Peak# | Ret. Time | Area     | Height | Area %  |
|-------|-----------|----------|--------|---------|
| 1     | 11.278    | 12259078 | 310085 | 50.925  |
| 2     | 27.787    | 11813674 | 128524 | 49.075  |
| Total |           | 24072751 | 438609 | 100.000 |

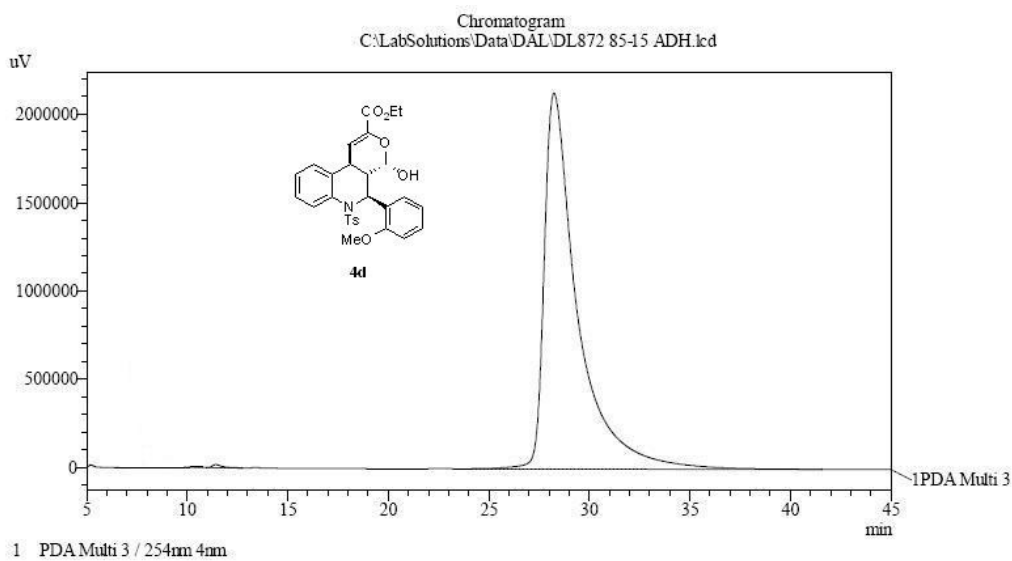

PeakTable

| Peak# | Ret. Time | Area      | Height  | Area %  |
|-------|-----------|-----------|---------|---------|
| 1     | 11.415    | 598533    | 17624   | 0.243   |
| 2     | 28.243    | 245341232 | 2126756 | 99.757  |
| Total |           | 245939765 | 2144380 | 100.000 |

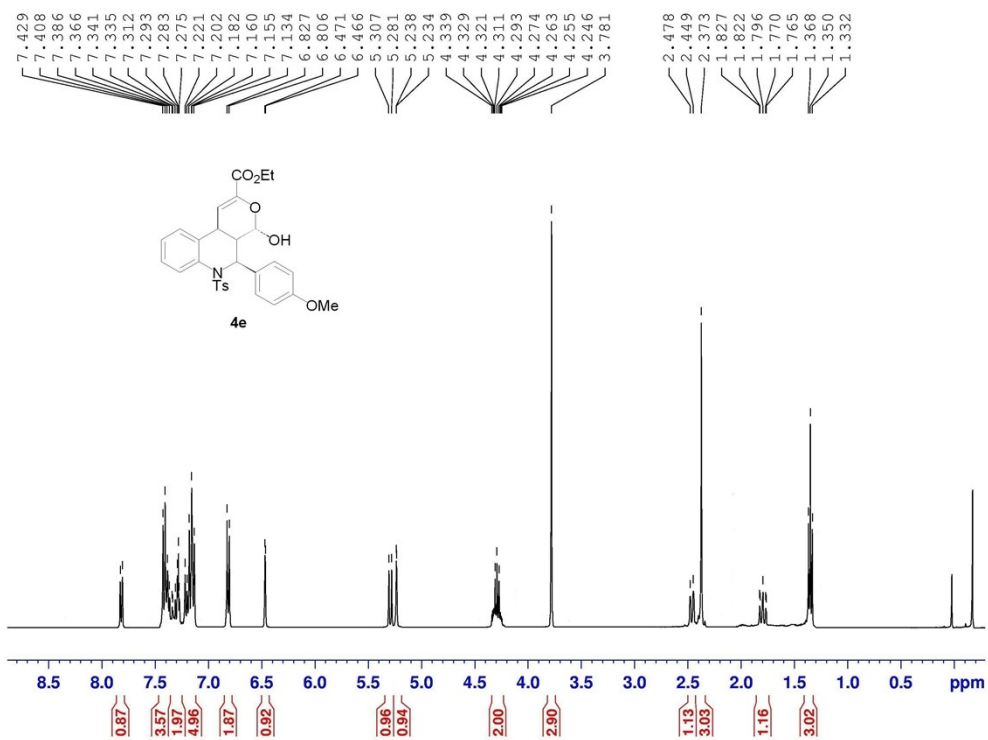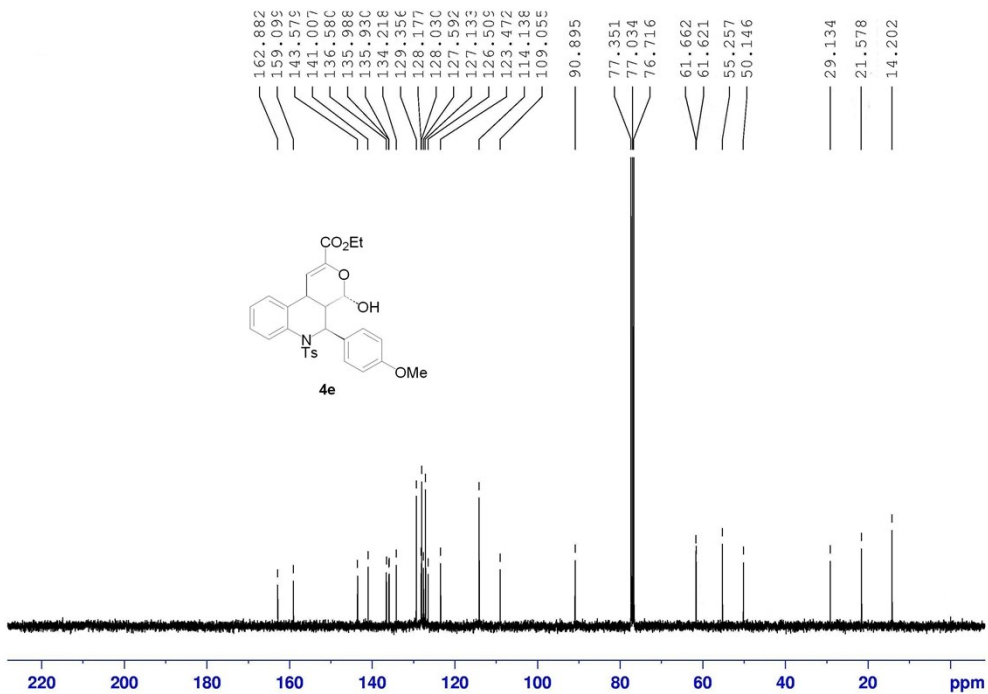

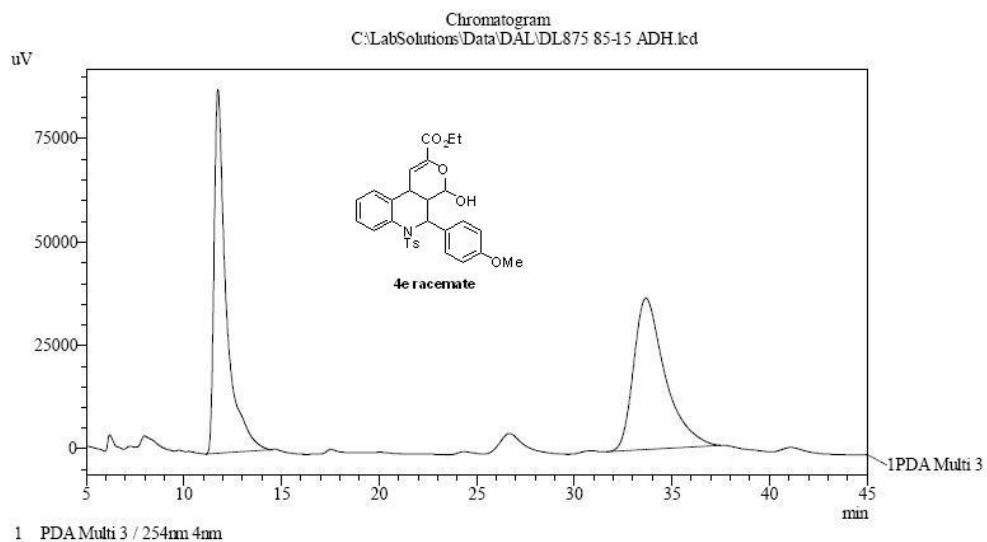

PeakTable

PDA Ch3 254nm 4nm

| Peak# | Ret. Time | Area    | Height | Area %  |
|-------|-----------|---------|--------|---------|
| 1     | 11.744    | 3827186 | 87985  | 48.247  |
| 2     | 33.674    | 4105247 | 36617  | 51.753  |
| Total |           | 7932433 | 124602 | 100.000 |

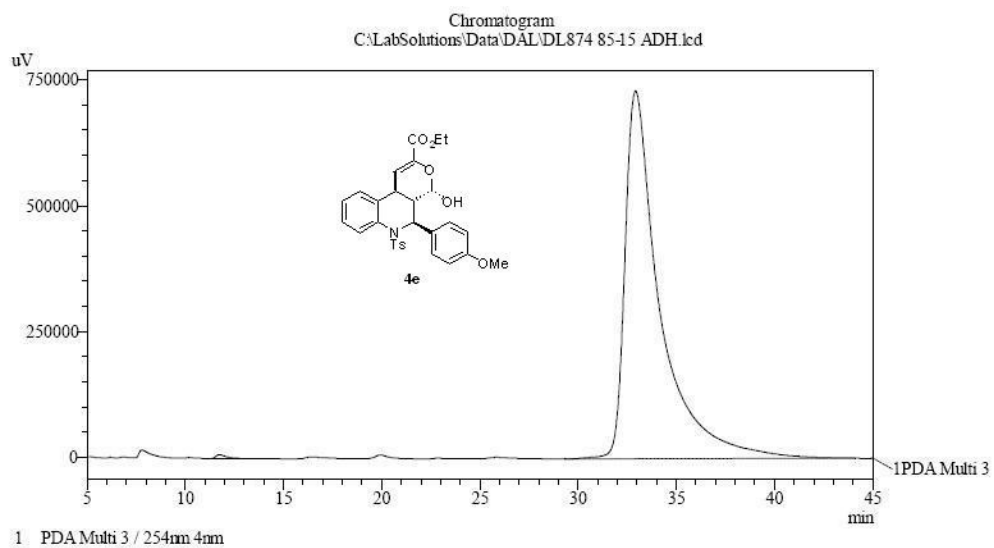

PeakTable

PDA Ch3 254nm 4nm

| Peak# | Ret. Time | Area     | Height | Area %  |
|-------|-----------|----------|--------|---------|
| 1     | 11.737    | 287618   | 7864   | 0.316   |
| 2     | 32.925    | 90714583 | 730090 | 99.684  |
| Total |           | 91002202 | 737954 | 100.000 |

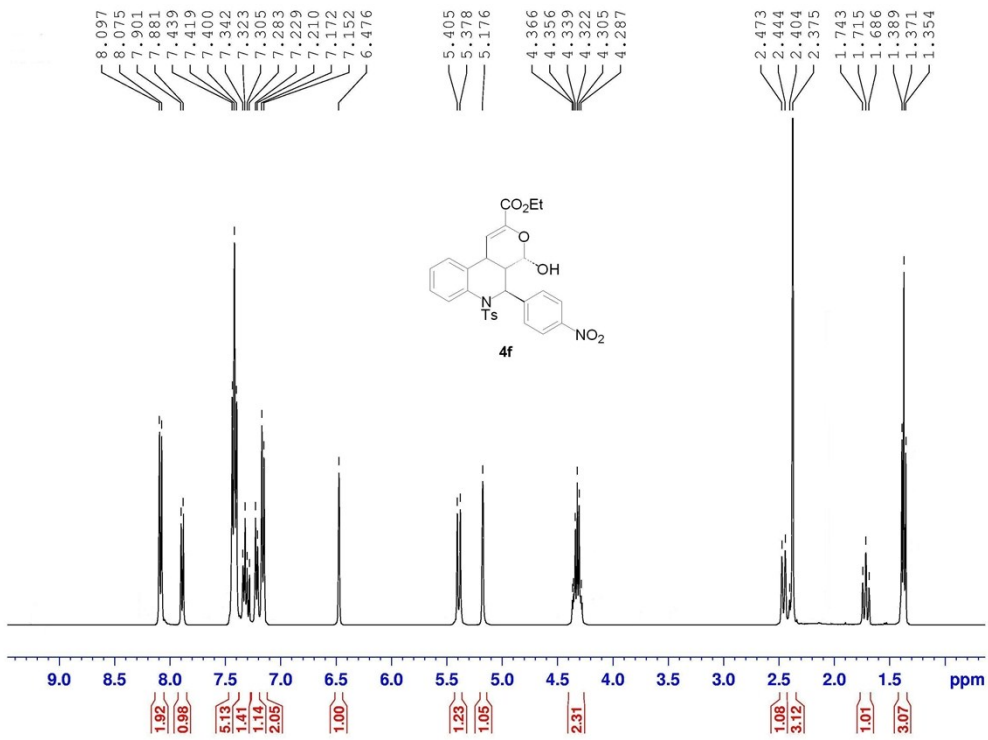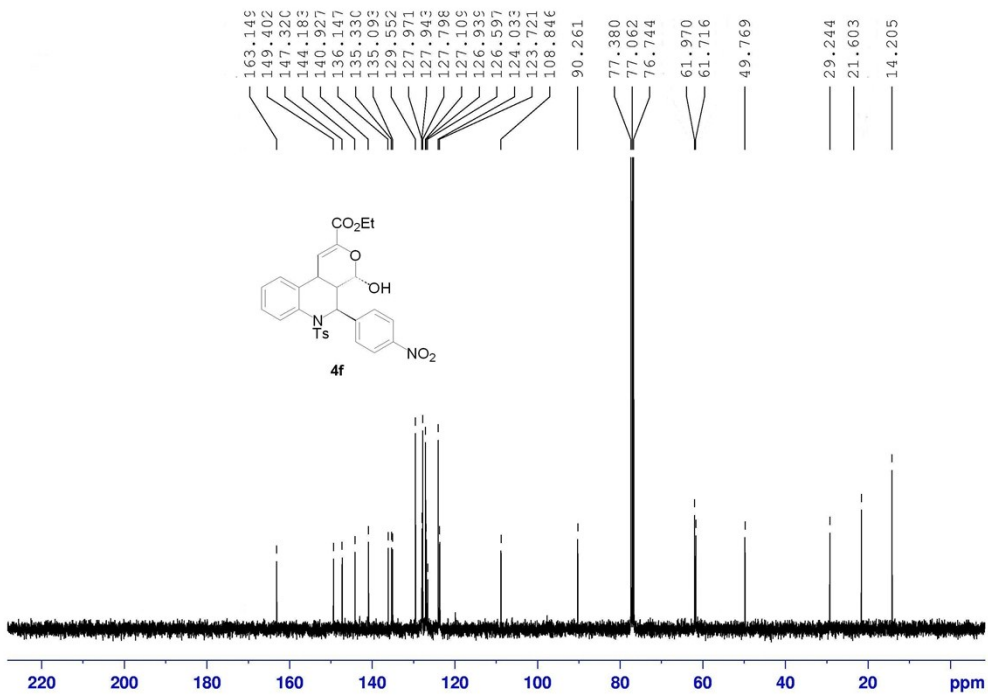

Chromatogram  
C:\LabSolutions\Data\DAL\DL881 85-15 ADH.kcd

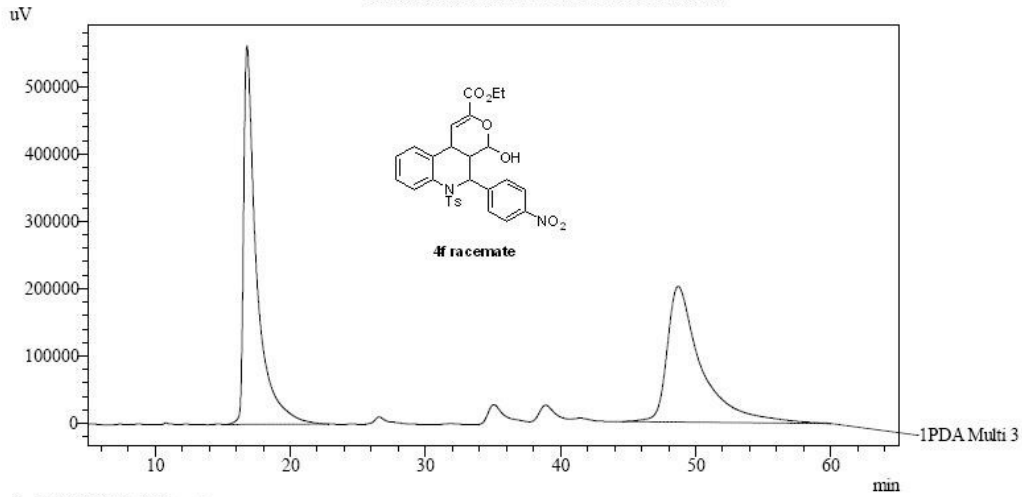

1 PDA Multi 3 / 254nm 4nm

PeakTable

PDA Ch3 254nm 4nm

| Peak# | Ret. Time | Area     | Height | Area %  |
|-------|-----------|----------|--------|---------|
| 1     | 16.796    | 37524026 | 561250 | 51.681  |
| 2     | 48.700    | 35082849 | 200912 | 48.319  |
| Total |           | 72606876 | 762162 | 100.000 |

Chromatogram  
C:\LabSolutions\Data\DAL\DL880 85-15 ADH.kcd

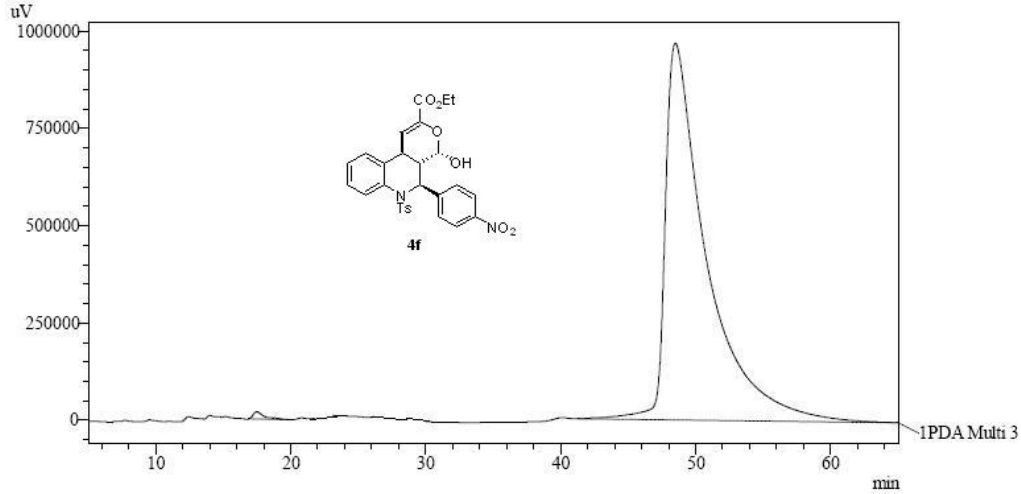

1 PDA Multi 3 / 254nm 4nm

PeakTable

PDA Ch3 254nm 4nm

| Peak# | Ret. Time | Area      | Height | Area %  |
|-------|-----------|-----------|--------|---------|
| 1     | 17.476    | 1097809   | 18715  | 0.532   |
| 2     | 48.495    | 205252245 | 968189 | 99.468  |
| Total |           | 206350055 | 986904 | 100.000 |

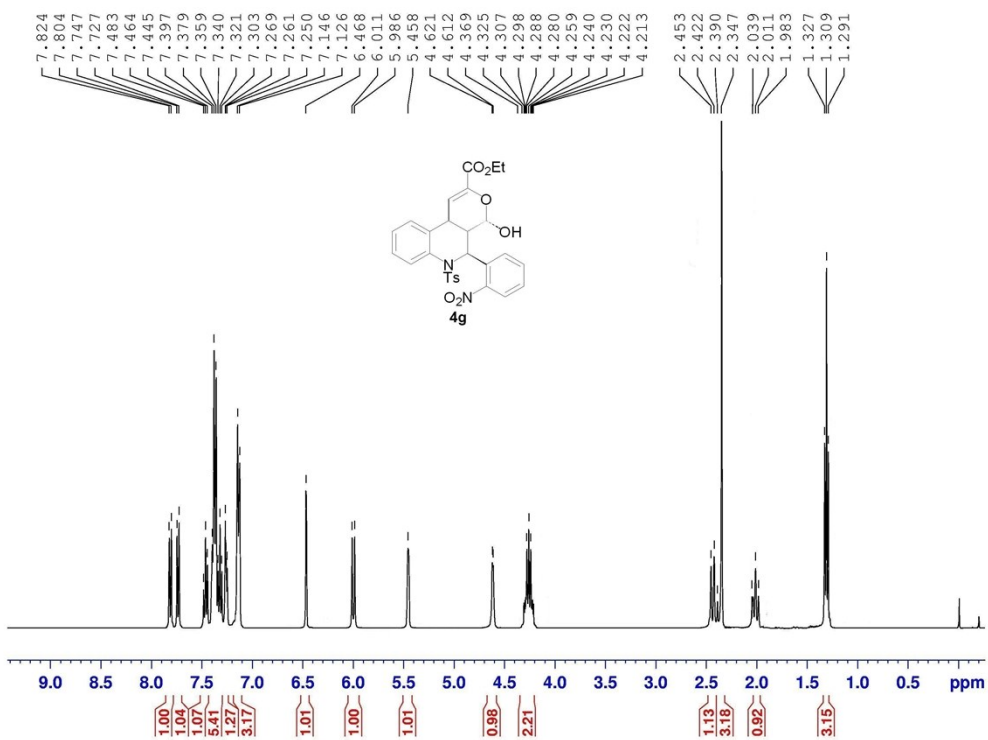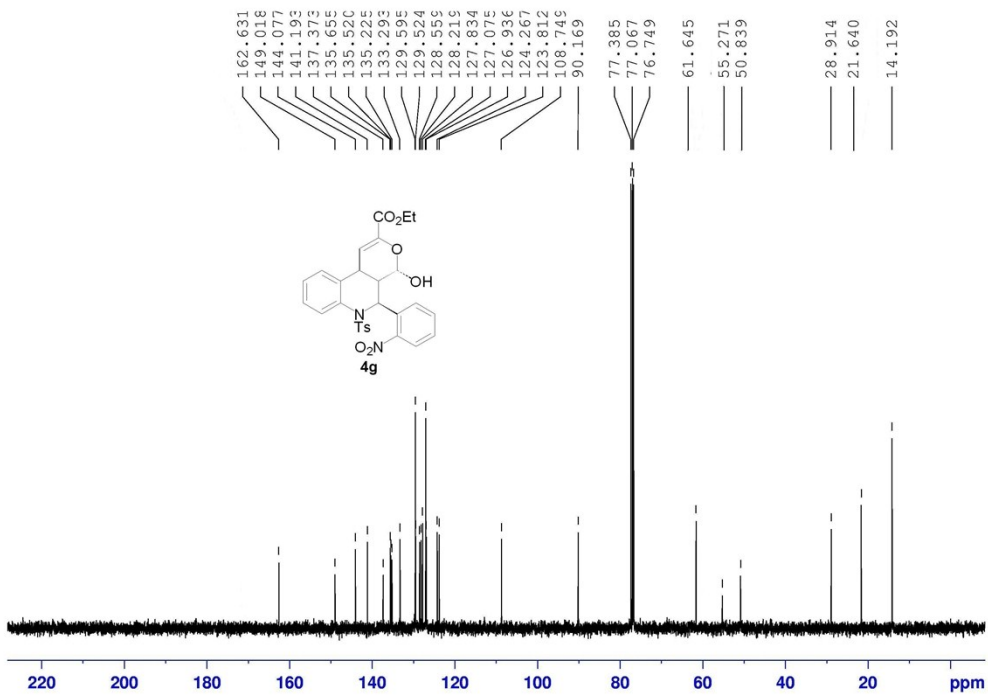

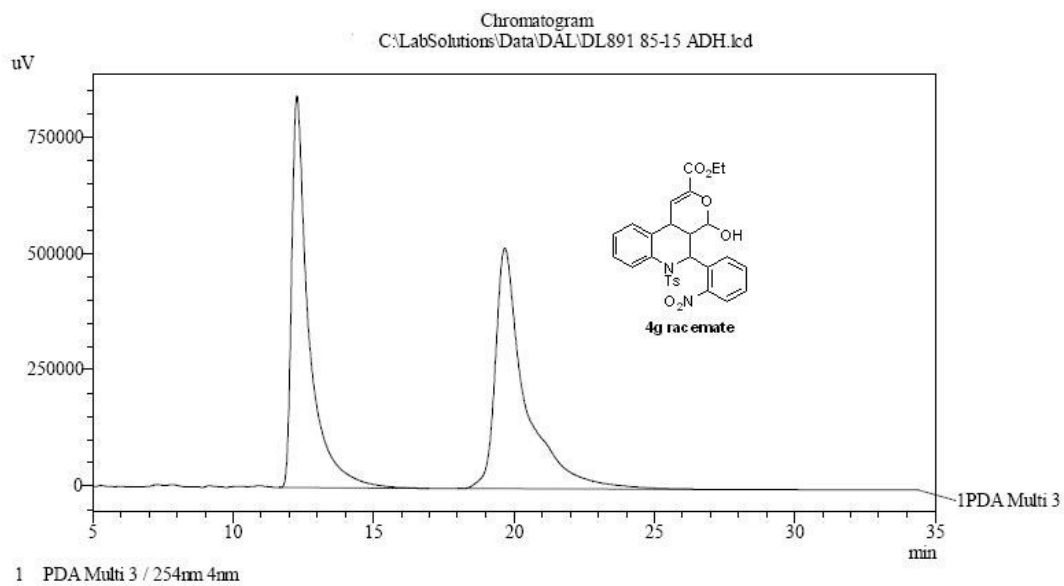

PeakTable  
PDA Ch3 254nm 4mm

| Peak# | Ret. Time | Area     | Height  | Area %  |
|-------|-----------|----------|---------|---------|
| 1     | 12.271    | 35829651 | 841649  | 48.341  |
| 2     | 19.673    | 38289292 | 517389  | 51.659  |
| Total |           | 74118943 | 1359038 | 100.000 |

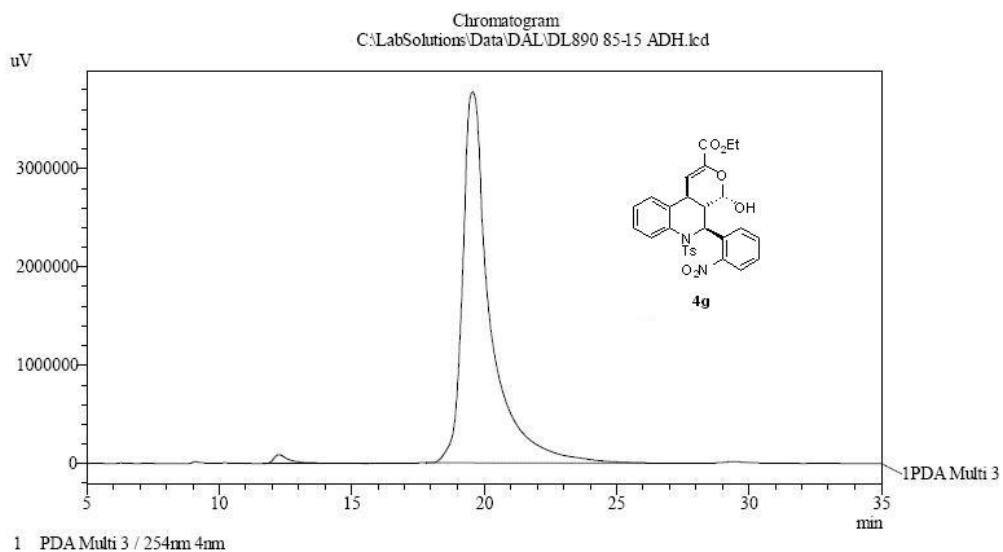

PeakTable  
PDA Ch3 254nm 4mm

| Peak# | Ret. Time | Area      | Height  | Area %  |
|-------|-----------|-----------|---------|---------|
| 1     | 12.253    | 3891953   | 89413   | 1.397   |
| 2     | 19.565    | 274654634 | 3776370 | 98.603  |
| Total |           | 278546587 | 3865782 | 100.000 |



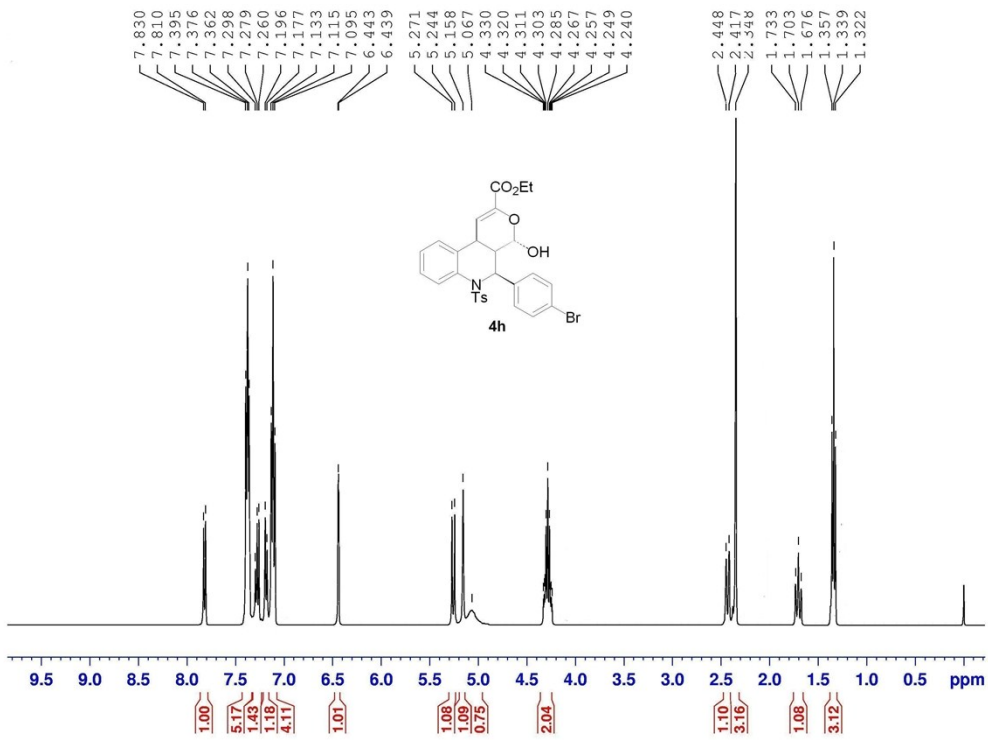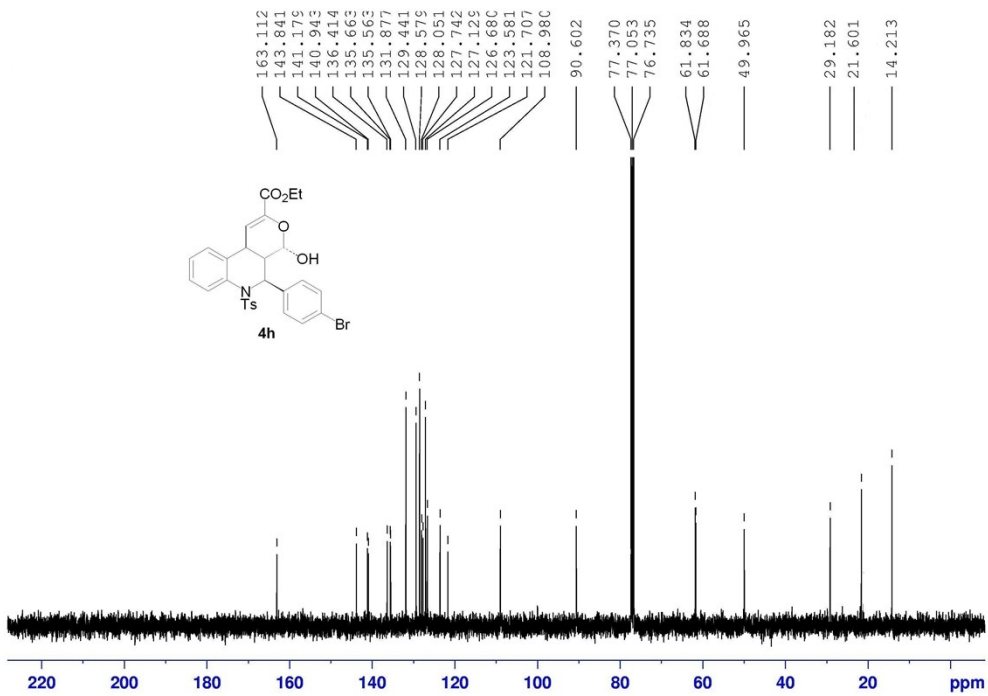

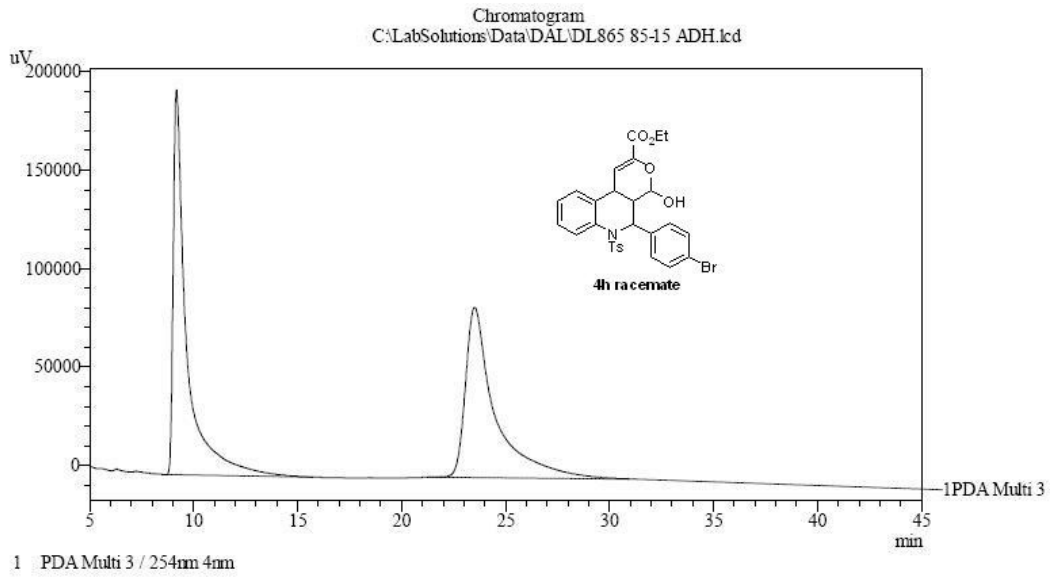

PeakTable

PDA Ch3 254nm 4nm

| Peak# | Ret. Time | Area     | Height | Area %  |
|-------|-----------|----------|--------|---------|
| 1     | 9.172     | 8784404  | 195438 | 50.671  |
| 2     | 23.510    | 8551718  | 86486  | 49.329  |
| Total |           | 17336122 | 281924 | 100.000 |

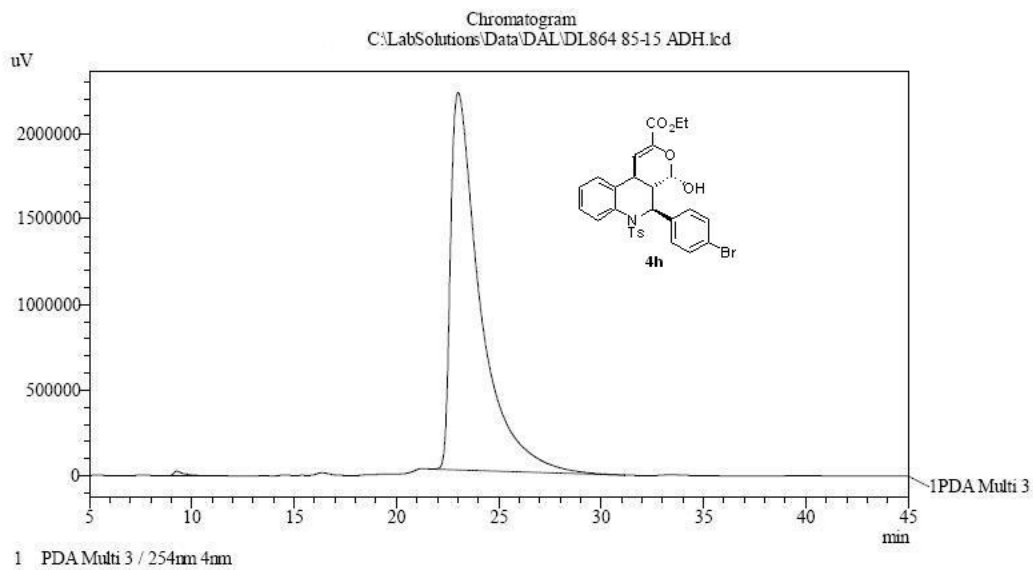

PeakTable

PDA Ch3 254nm 4nm

| Peak# | Ret. Time | Area      | Height  | Area %  |
|-------|-----------|-----------|---------|---------|
| 1     | 9.270     | 966885    | 26792   | 0.432   |
| 2     | 23.006    | 222630775 | 2204551 | 99.568  |
| Total |           | 223597660 | 2231343 | 100.000 |

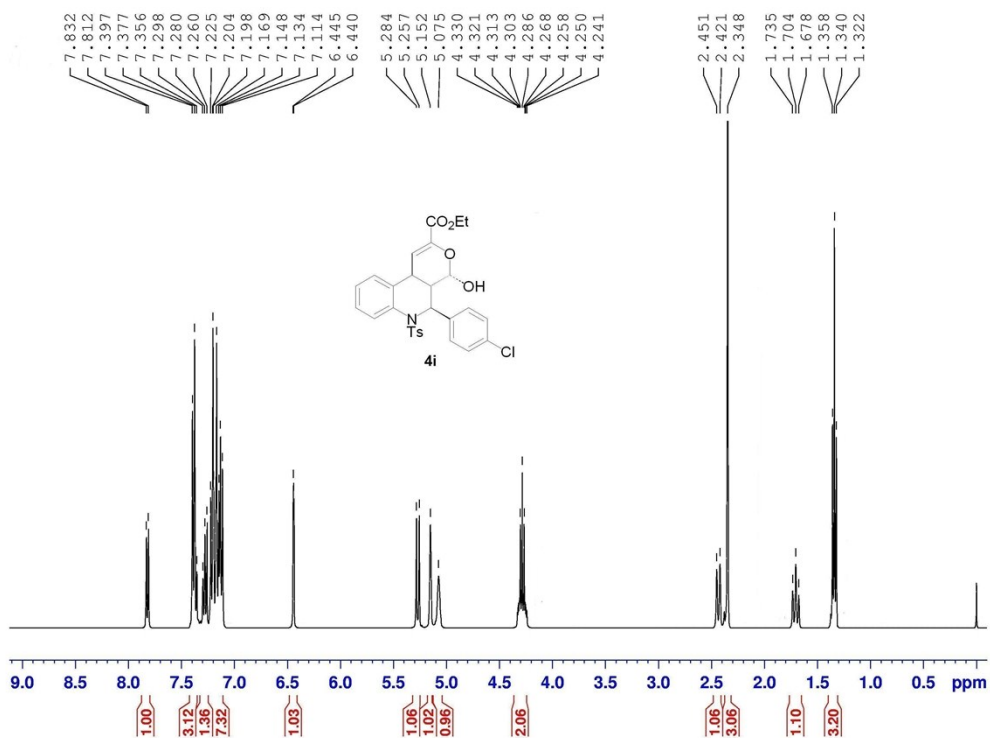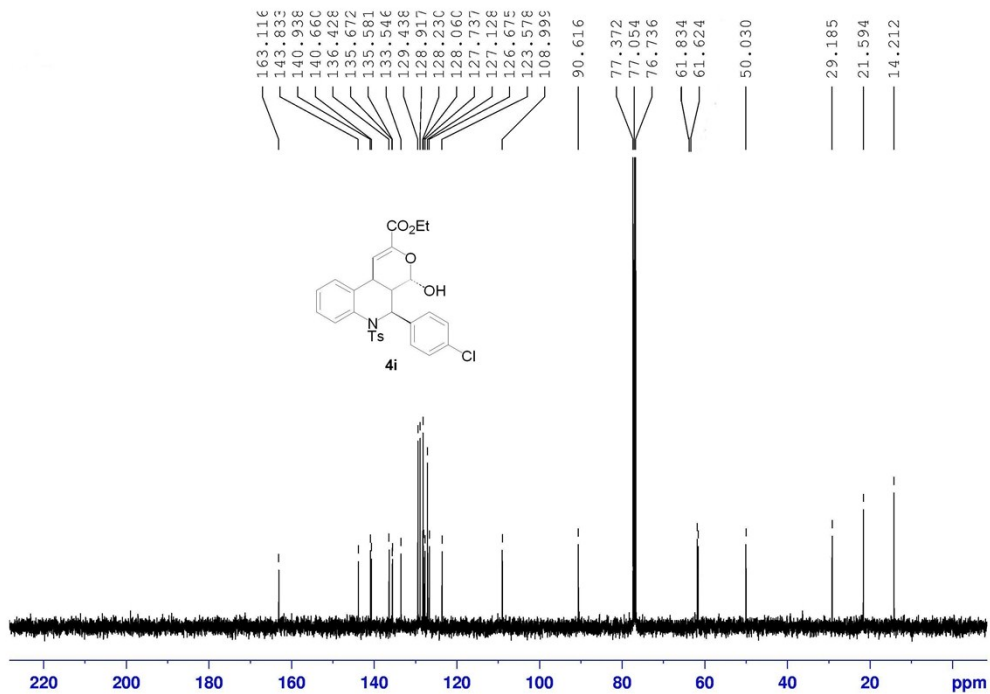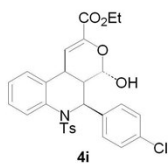

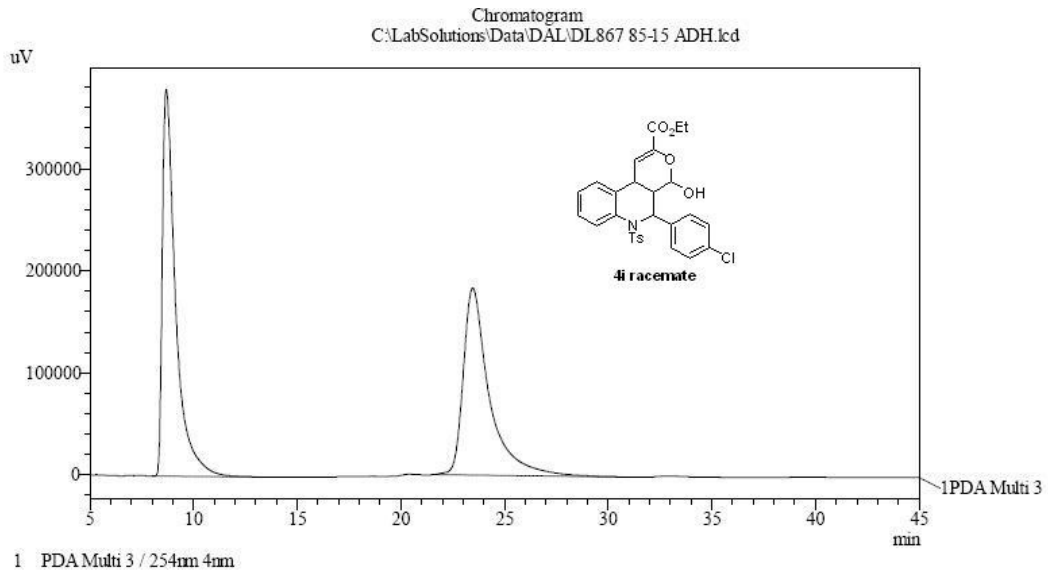

PeakTable

PDA Ch3 254nm 4nm

| Peak# | Ret. Time | Area     | Height | Area %  |
|-------|-----------|----------|--------|---------|
| 1     | 8.680     | 17020556 | 379214 | 51.333  |
| 2     | 23.465    | 16136589 | 183392 | 48.667  |
| Total |           | 33157145 | 562607 | 100.000 |

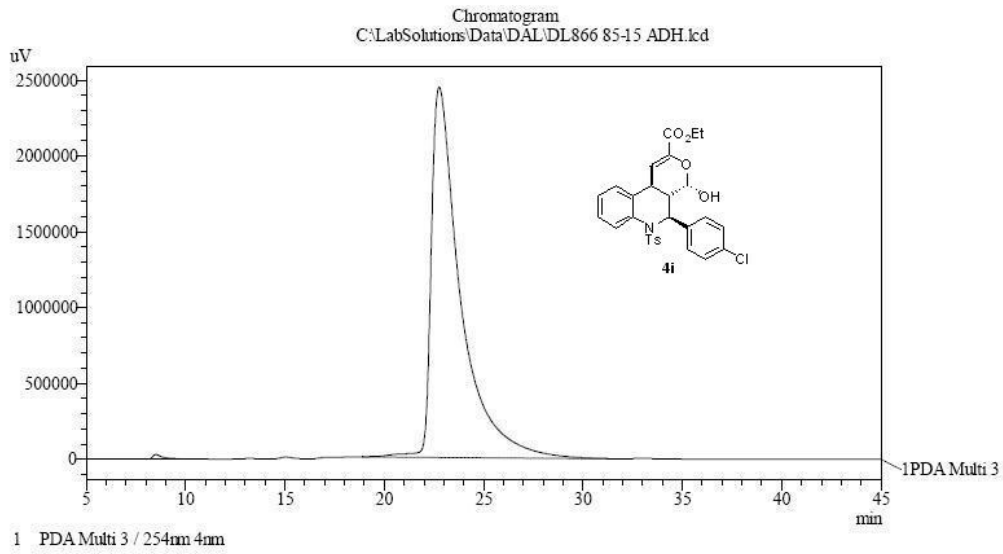

PeakTable

PDA Ch3 254nm 4nm

| Peak# | Ret. Time | Area      | Height  | Area %  |
|-------|-----------|-----------|---------|---------|
| 1     | 8.499     | 1086591   | 30775   | 0.432   |
| 2     | 22.769    | 250533334 | 2441411 | 99.568  |
| Total |           | 251619924 | 2472185 | 100.000 |

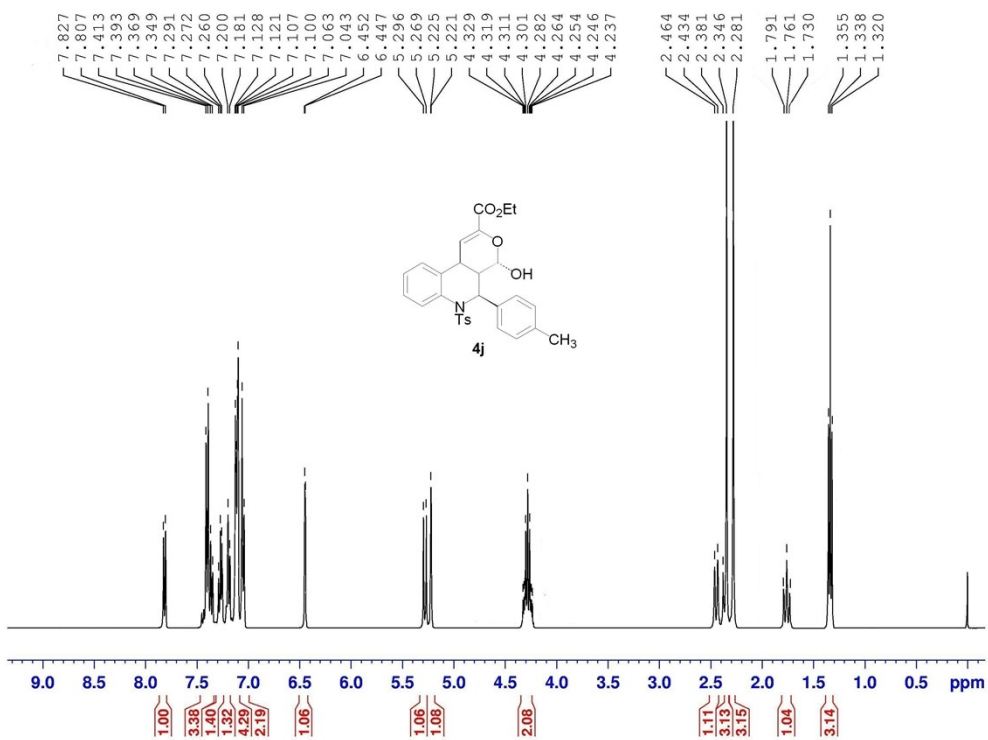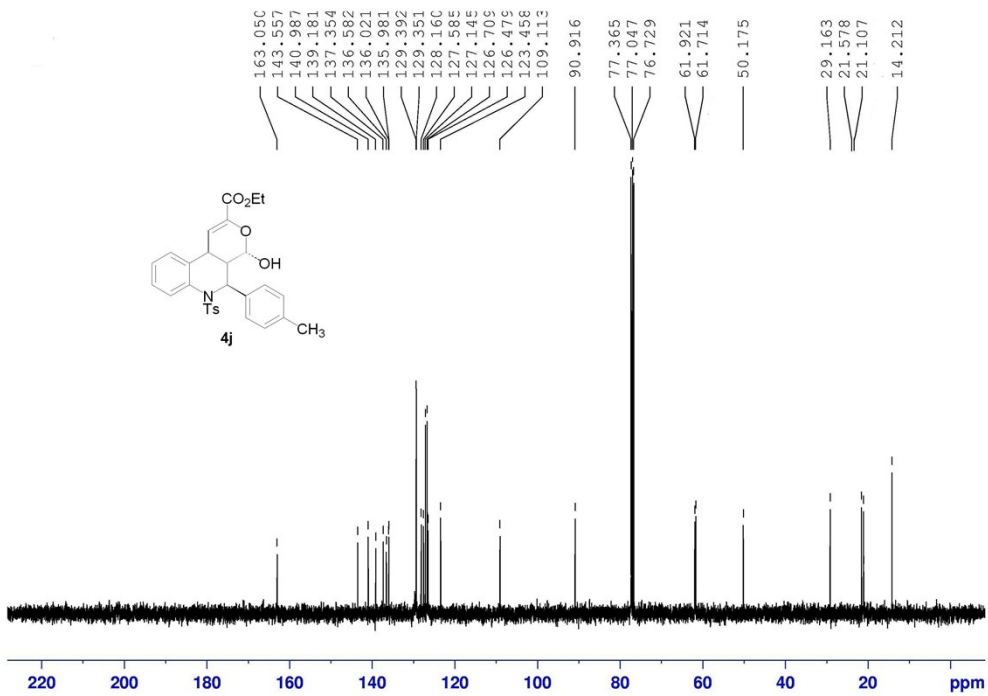

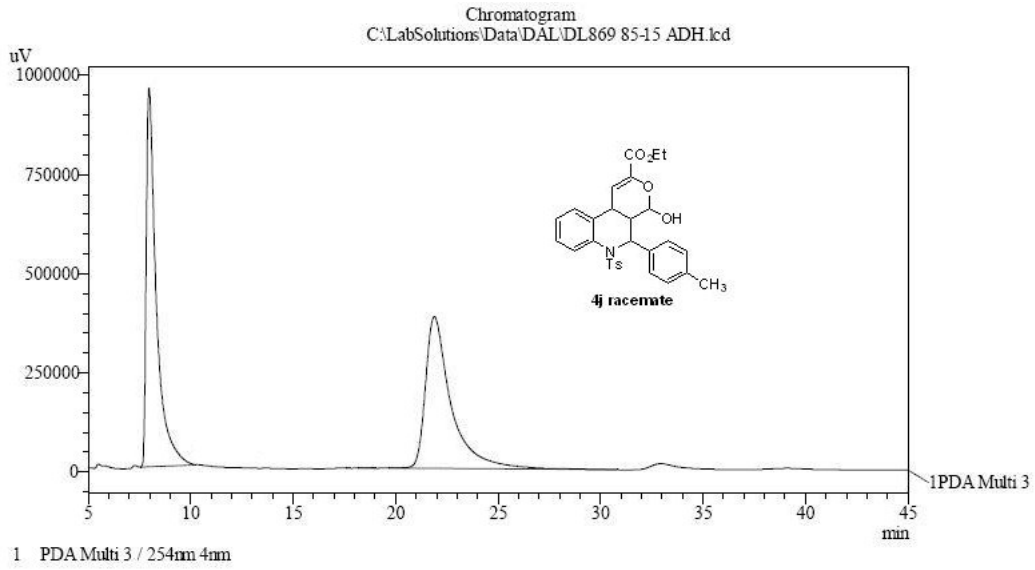

PeakTable

| Peak# | Ret. Time | Area     | Height  | Area %  |
|-------|-----------|----------|---------|---------|
| 1     | 7.964     | 32779815 | 955668  | 49.403  |
| 2     | 21.887    | 33571930 | 383370  | 50.597  |
| Total |           | 66351745 | 1339038 | 100.000 |

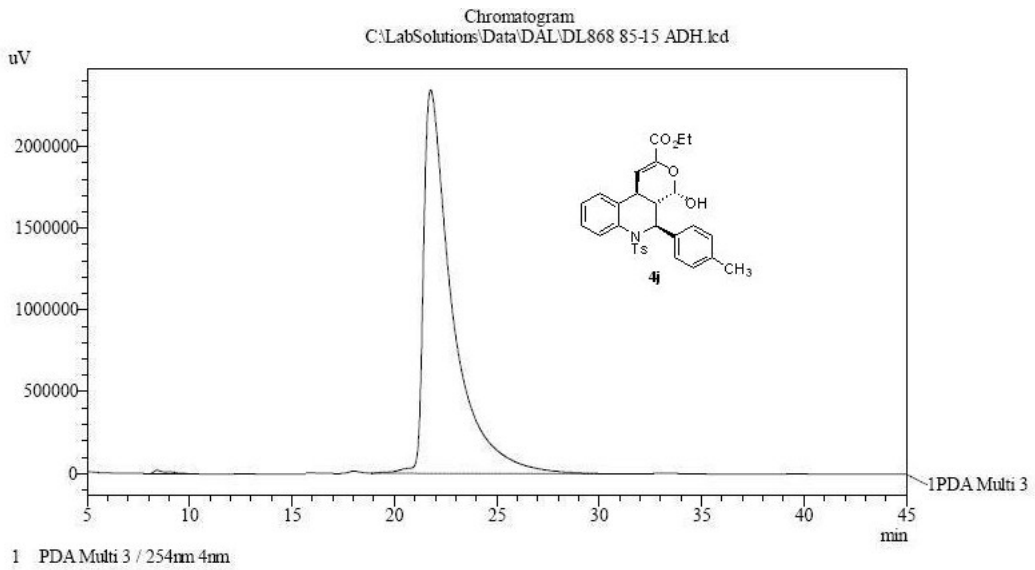

PeakTable

| Peak# | Ret. Time | Area      | Height  | Area %  |
|-------|-----------|-----------|---------|---------|
| 1     | 8.402     | 902335    | 20180   | 0.392   |
| 2     | 21.773    | 229166365 | 2343217 | 99.608  |
| Total |           | 230068700 | 2363397 | 100.000 |

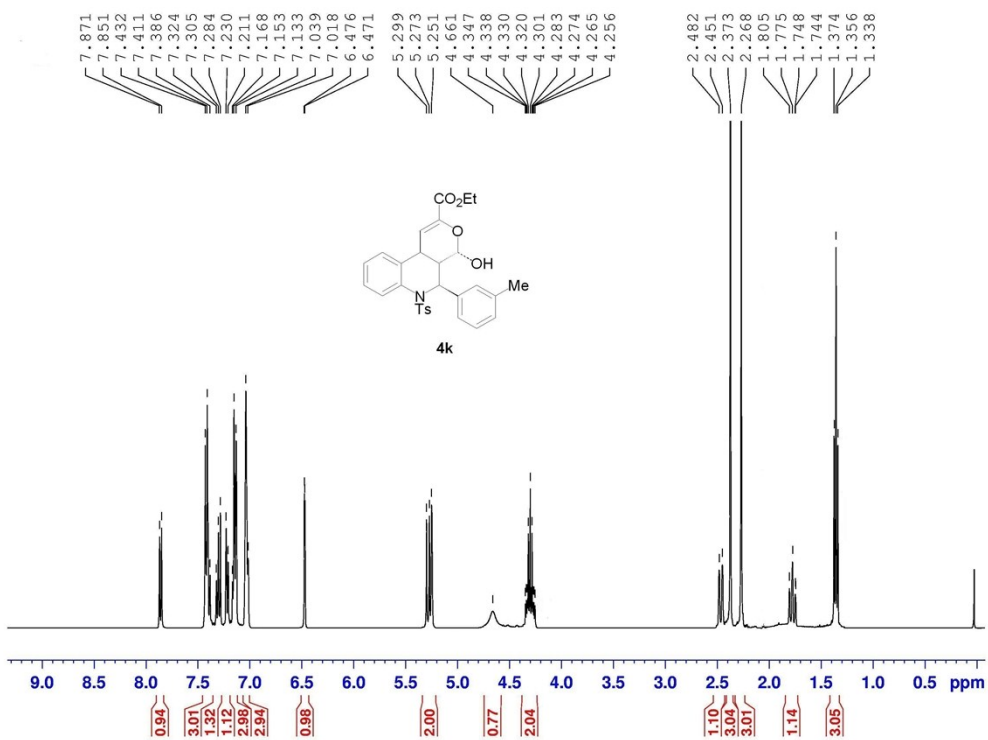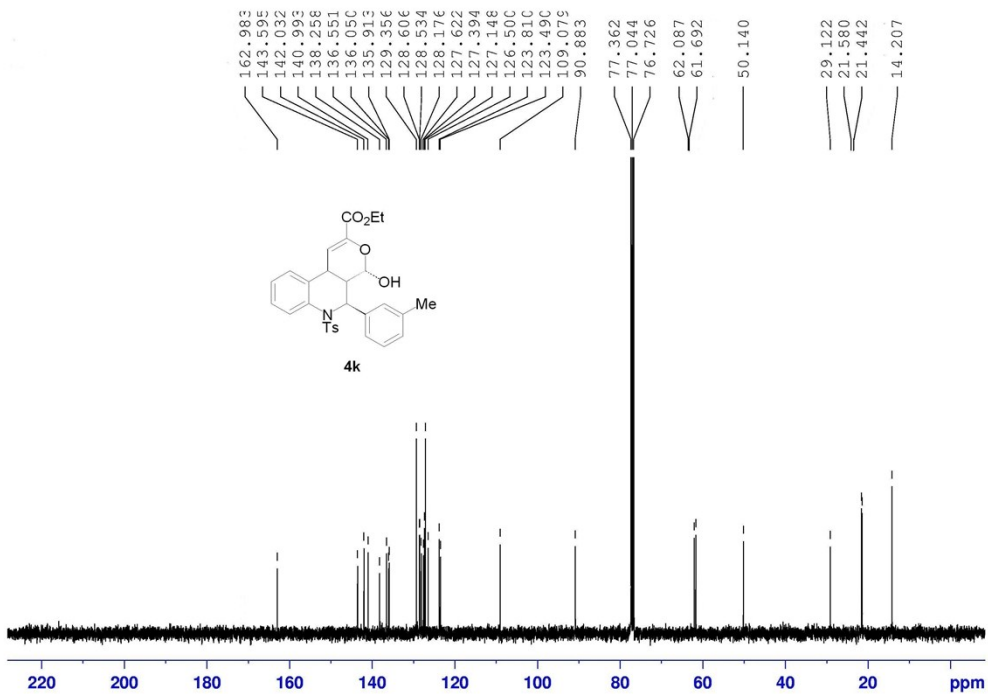

Chromatogram  
C:\LabSolutions\Data\DAL\DL879 85-15 ADH.lcd

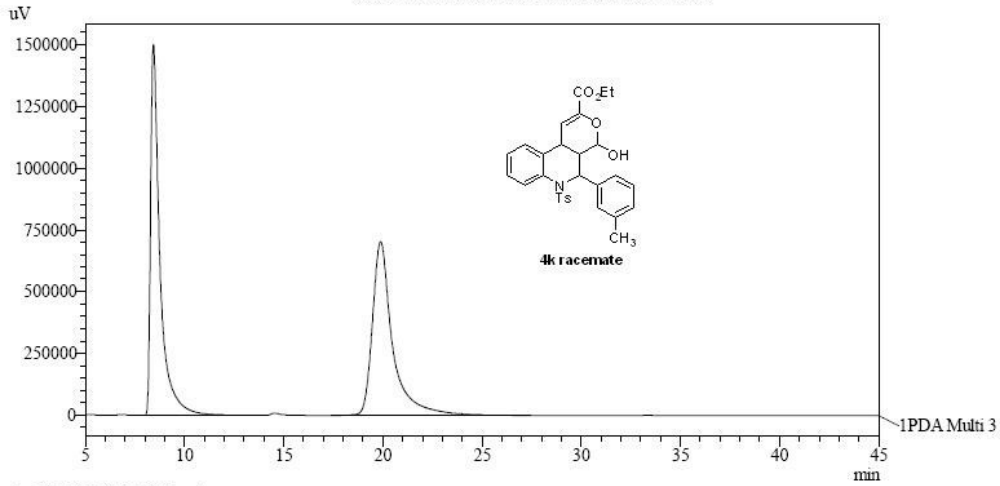

PeakTable

PDA Ch3 254nm 4nm

| Peak# | Ret. Time | Area     | Height  | Area %  |
|-------|-----------|----------|---------|---------|
| 1     | 8.427     | 49289291 | 1500585 | 49.611  |
| 2     | 19.884    | 50061724 | 703543  | 50.389  |
| Total |           | 99351015 | 2204128 | 100.000 |

Chromatogram  
C:\LabSolutions\Data\DAL\DL878 85-15 ADH.lcd

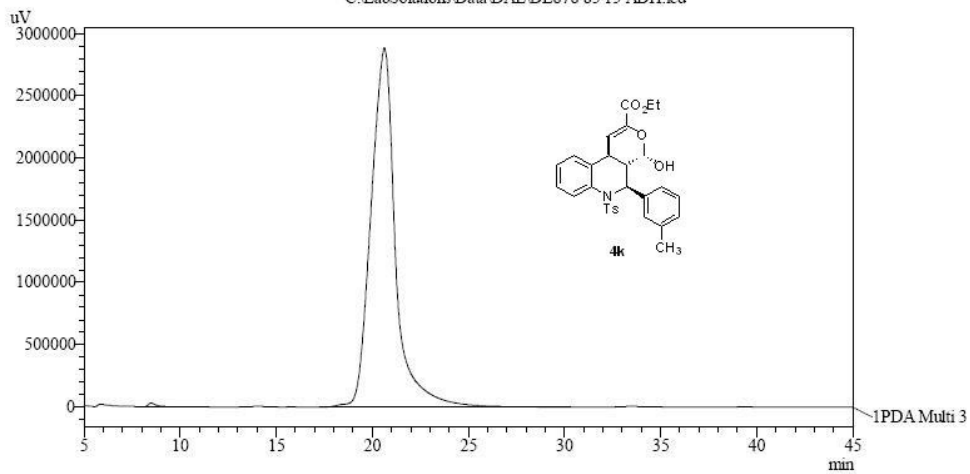

PeakTable

PDA Ch3 254nm 4nm

| Peak# | Ret. Time | Area      | Height  | Area %  |
|-------|-----------|-----------|---------|---------|
| 1     | 8.484     | 841559    | 29900   | 0.327   |
| 2     | 20.626    | 256797173 | 2893169 | 99.673  |
| Total |           | 257638732 | 2923070 | 100.000 |



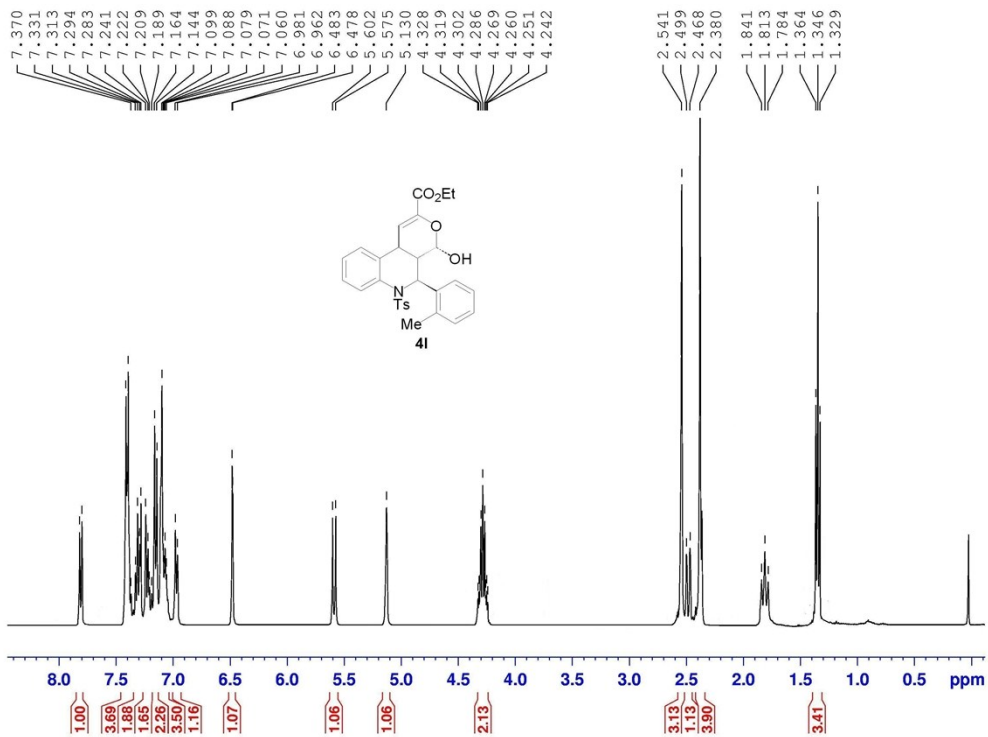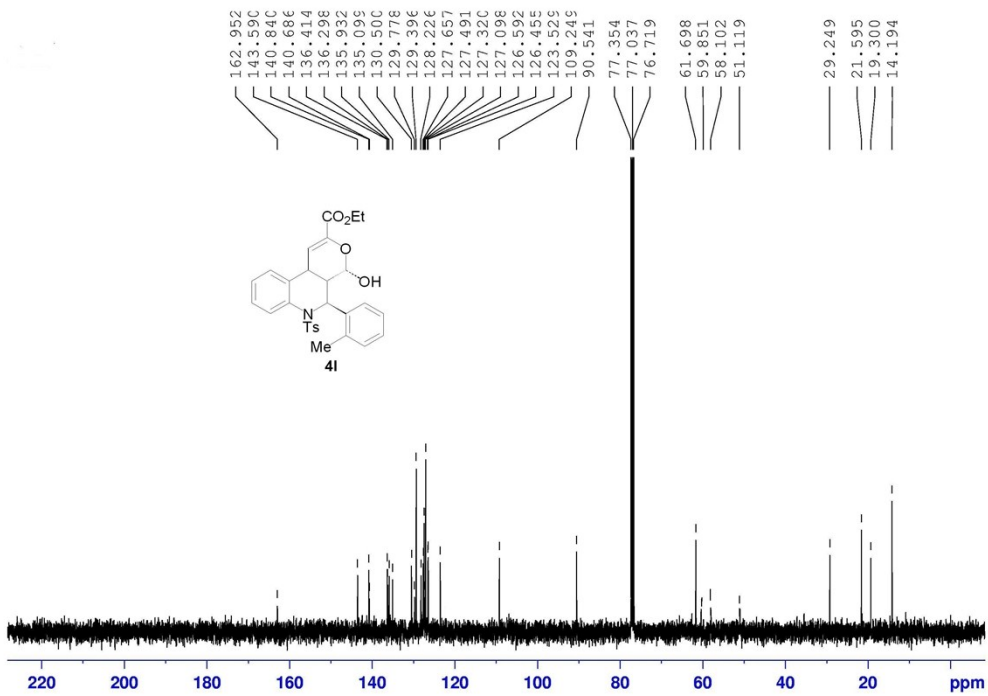

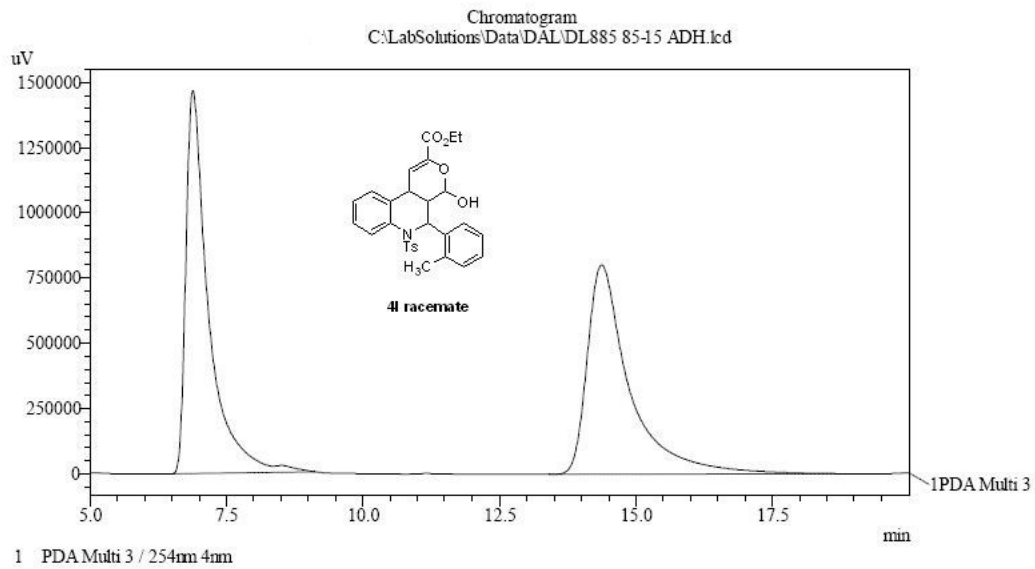

PeakTable

PDA Ch3 254nm 4nm

| Peak# | Ret. Time | Area     | Height  | Area %  |
|-------|-----------|----------|---------|---------|
| 1     | 6.883     | 42466097 | 1468262 | 49.497  |
| 2     | 14.368    | 43328841 | 802340  | 50.503  |
| Total |           | 85794938 | 2270602 | 100.000 |

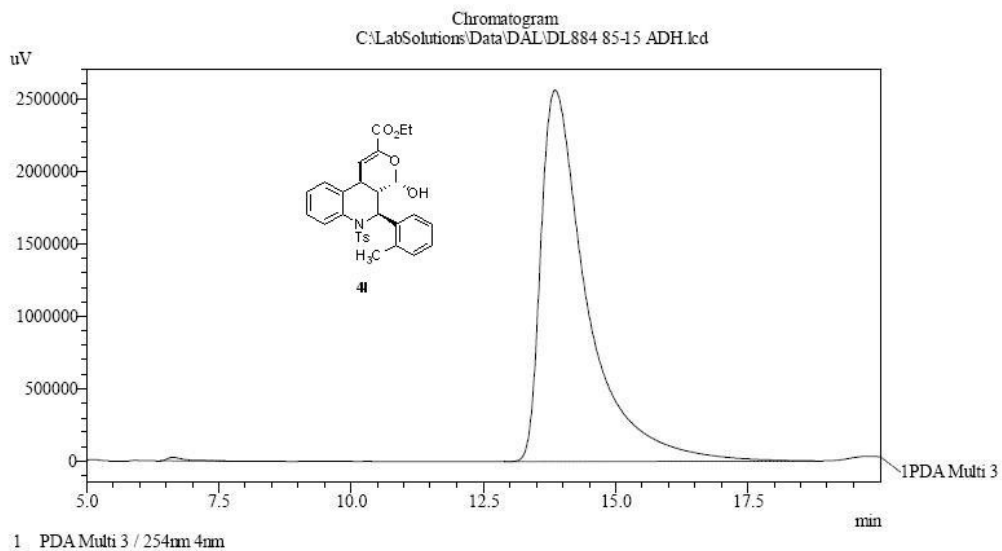

PeakTable

PDA Ch3 254nm 4nm

| Peak# | Ret. Time | Area      | Height  | Area %  |
|-------|-----------|-----------|---------|---------|
| 1     | 6.630     | 610730    | 25335   | 0.391   |
| 2     | 13.851    | 155667766 | 2562500 | 99.609  |
| Total |           | 156278496 | 2587835 | 100.000 |

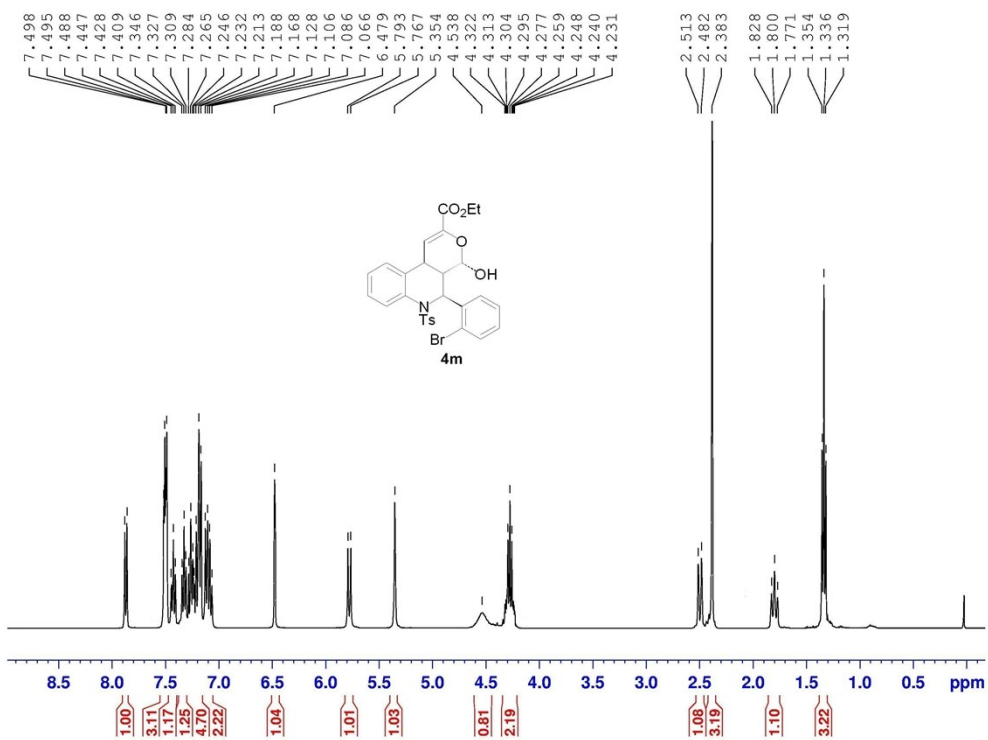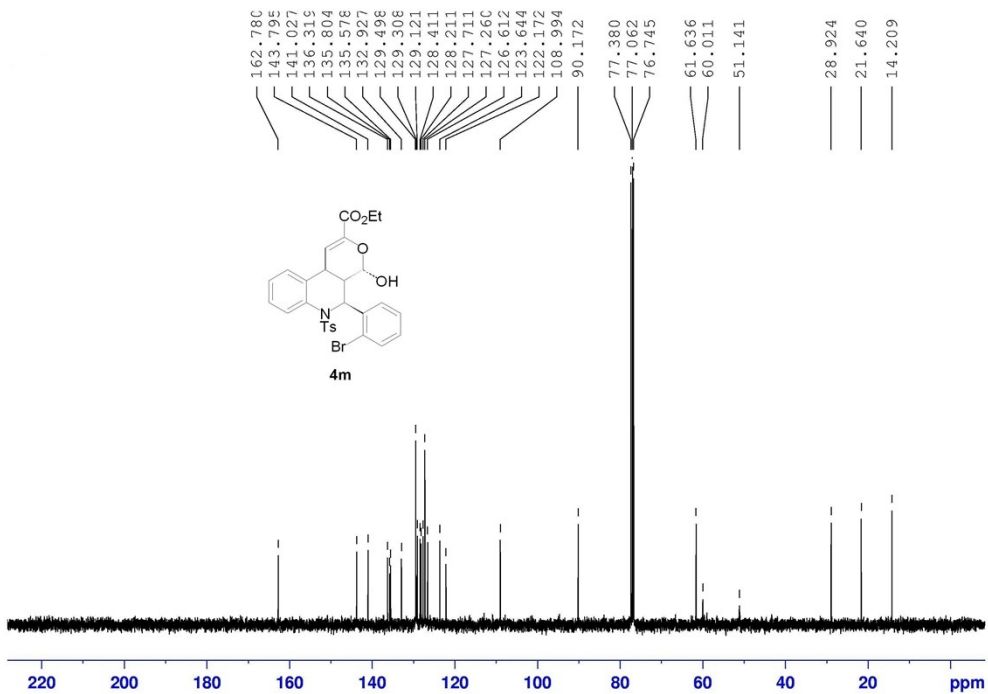

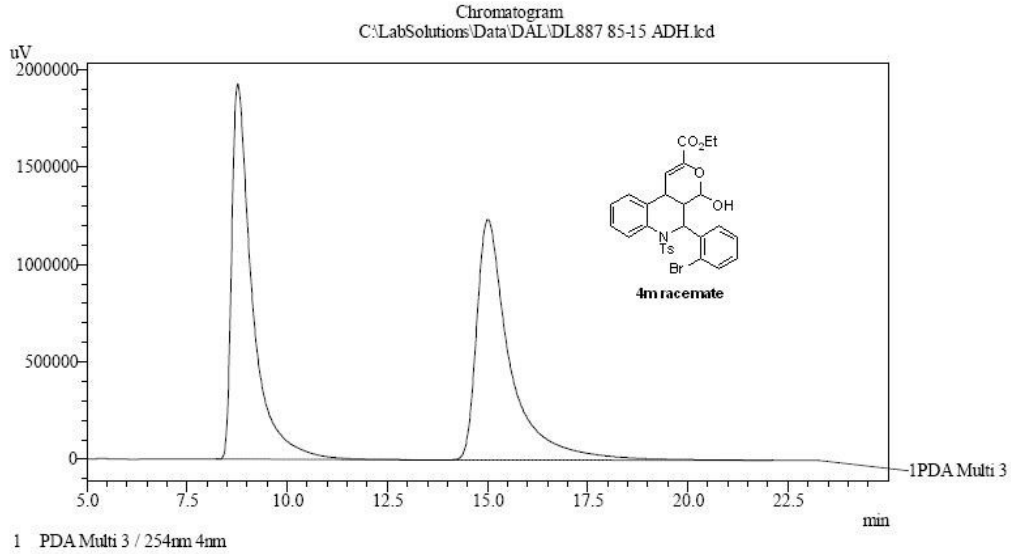

PeakTable

PDA Ch3 254nm 4nm

| Peak# | Ret. Time | Area      | Height  | Area %  |
|-------|-----------|-----------|---------|---------|
| 1     | 8.766     | 68974819  | 1925868 | 49.154  |
| 2     | 15.007    | 71349248  | 1234177 | 50.846  |
| Total |           | 140324067 | 3160045 | 100.000 |

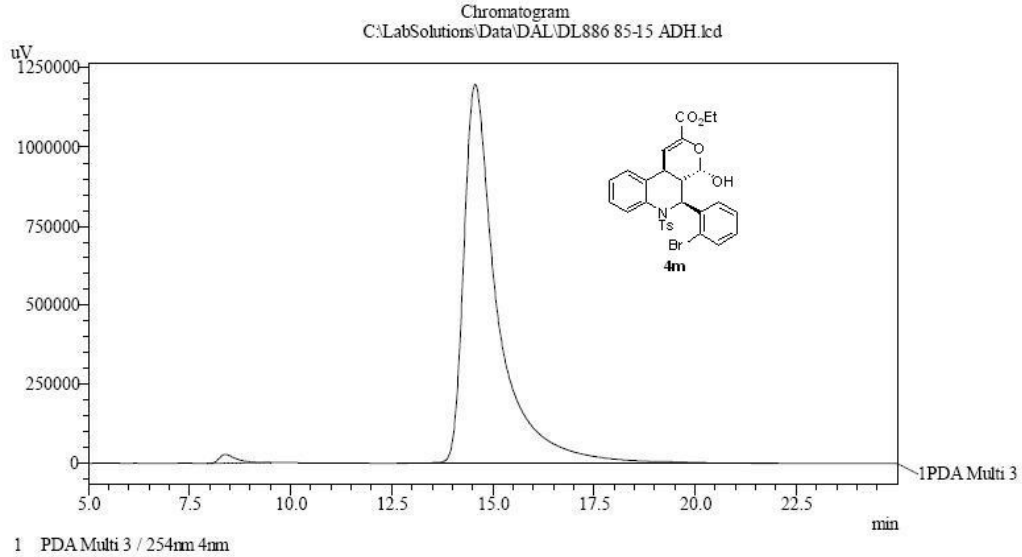

PeakTable

PDA Ch3 254nm 4nm

| Peak# | Ret. Time | Area     | Height  | Area %  |
|-------|-----------|----------|---------|---------|
| 1     | 8.382     | 826879   | 27730   | 1.167   |
| 2     | 14.561    | 70020614 | 1199109 | 98.833  |
| Total |           | 70847493 | 1226839 | 100.000 |

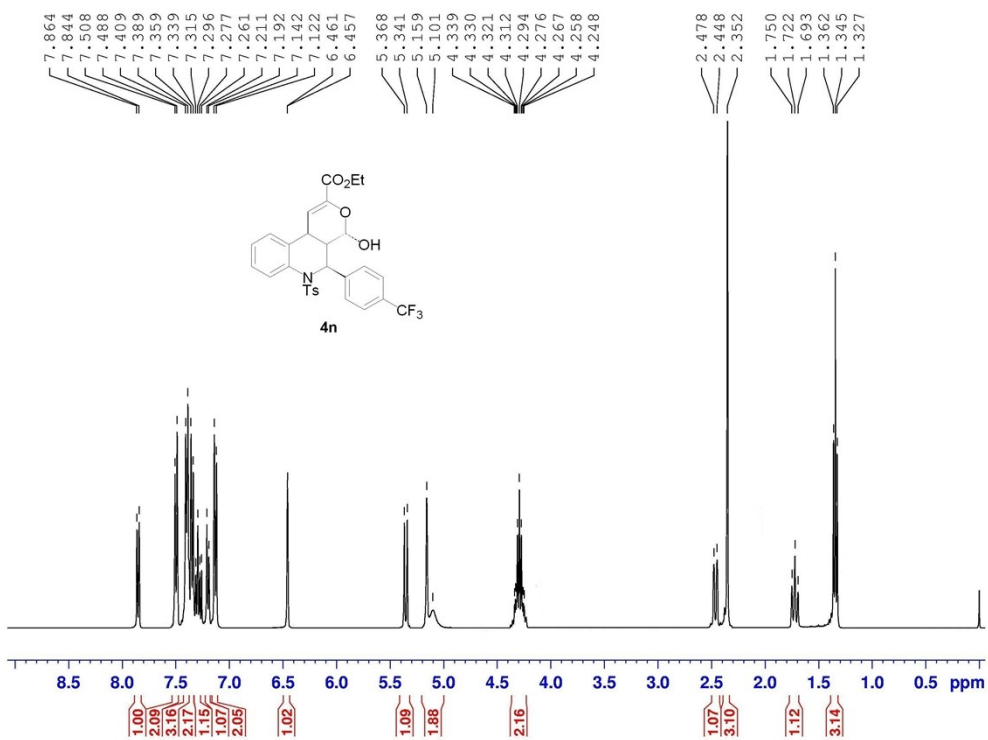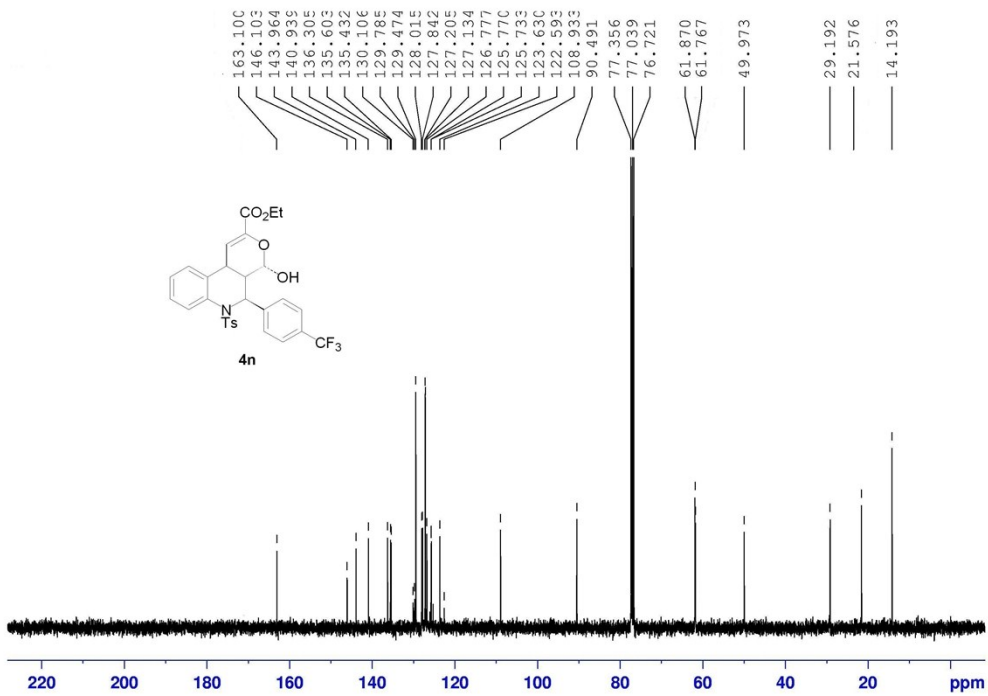

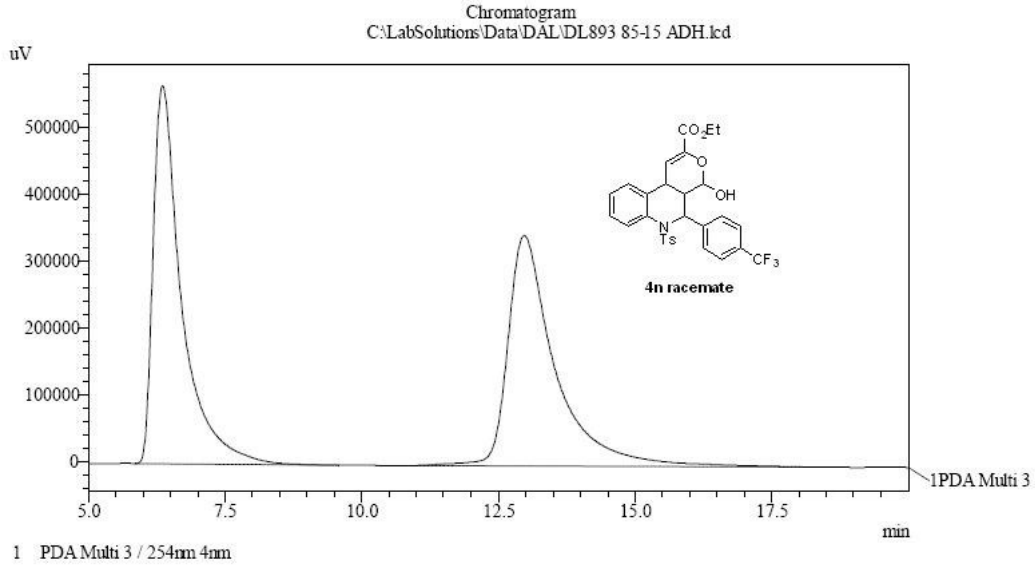

PeakTable

PDA Ch3 254nm 4nm

| Peak# | Ret. Time | Area     | Height | Area %  |
|-------|-----------|----------|--------|---------|
| 1     | 6.355     | 20409154 | 564175 | 49.537  |
| 2     | 12.969    | 20790918 | 344056 | 50.463  |
| Total |           | 41200073 | 908231 | 100.000 |

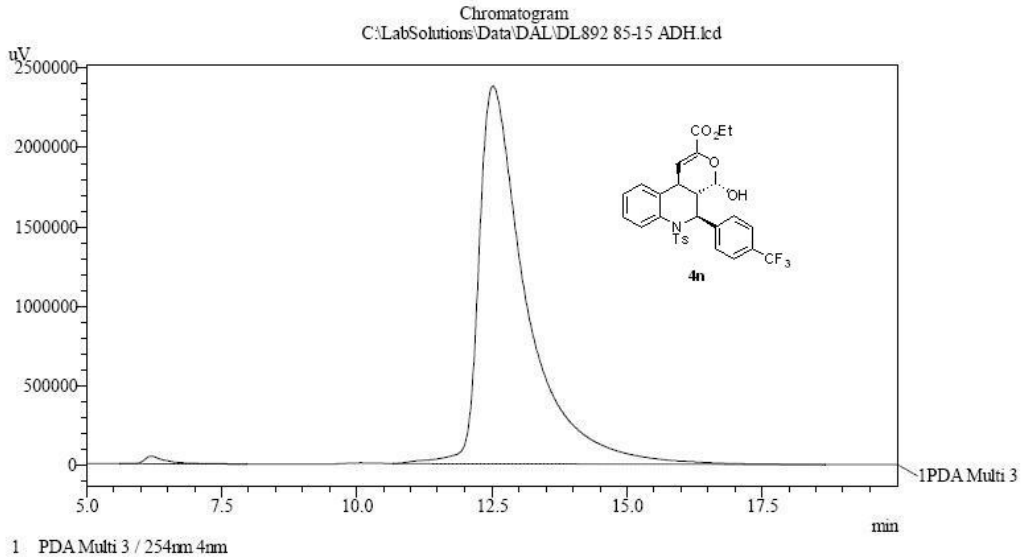

PeakTable

PDA Ch3 254nm 4nm

| Peak# | Ret. Time | Area      | Height  | Area %  |
|-------|-----------|-----------|---------|---------|
| 1     | 6.198     | 1328128   | 47290   | 0.902   |
| 2     | 12.521    | 145896697 | 2376854 | 99.098  |
| Total |           | 147224825 | 2424144 | 100.000 |

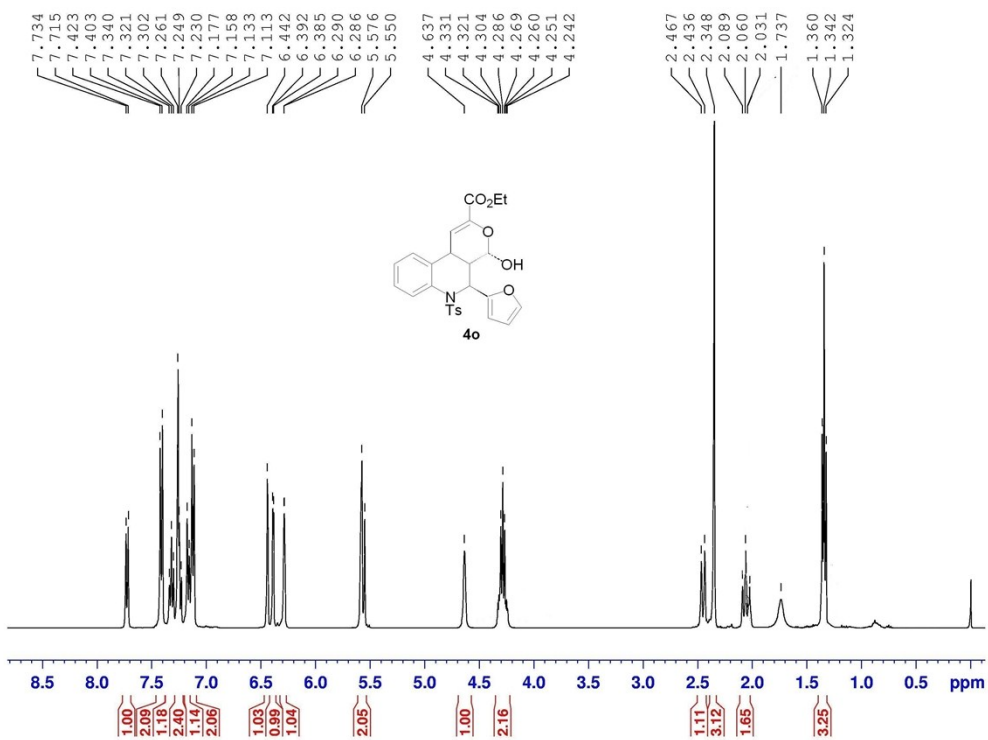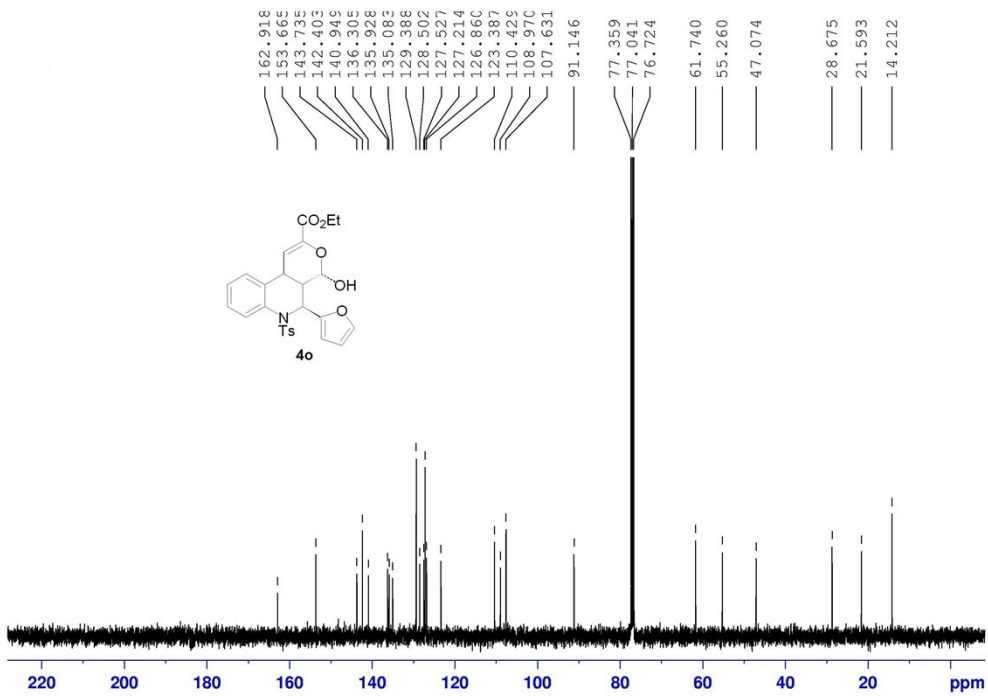

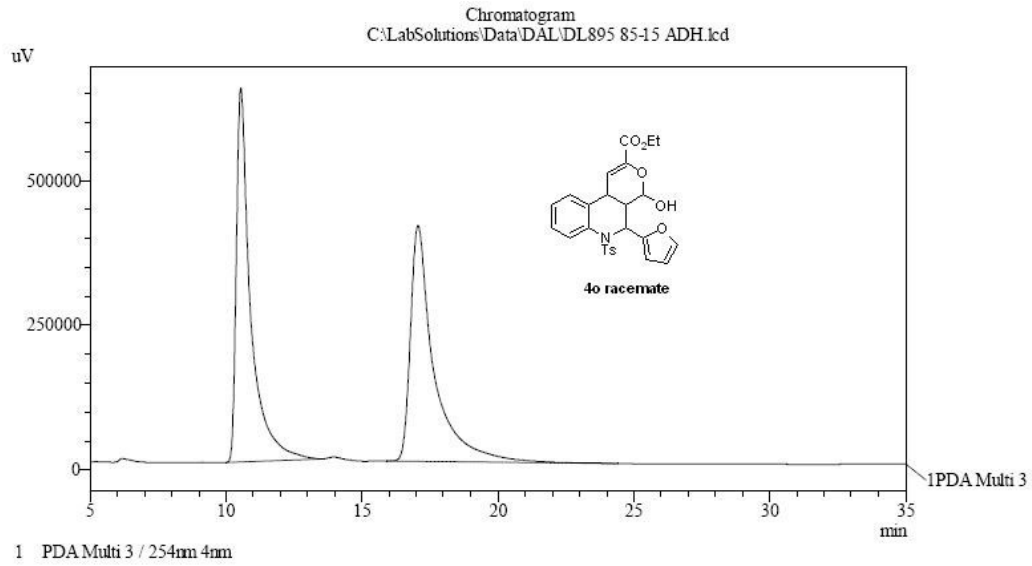

PeakTable

PDA Ch3 254nm 4nm

| Peak# | Ret. Time | Area     | Height  | Area %  |
|-------|-----------|----------|---------|---------|
| 1     | 10.543    | 23629033 | 646045  | 48.958  |
| 2     | 17.060    | 24634626 | 407596  | 51.042  |
| Total |           | 48263660 | 1053641 | 100.000 |

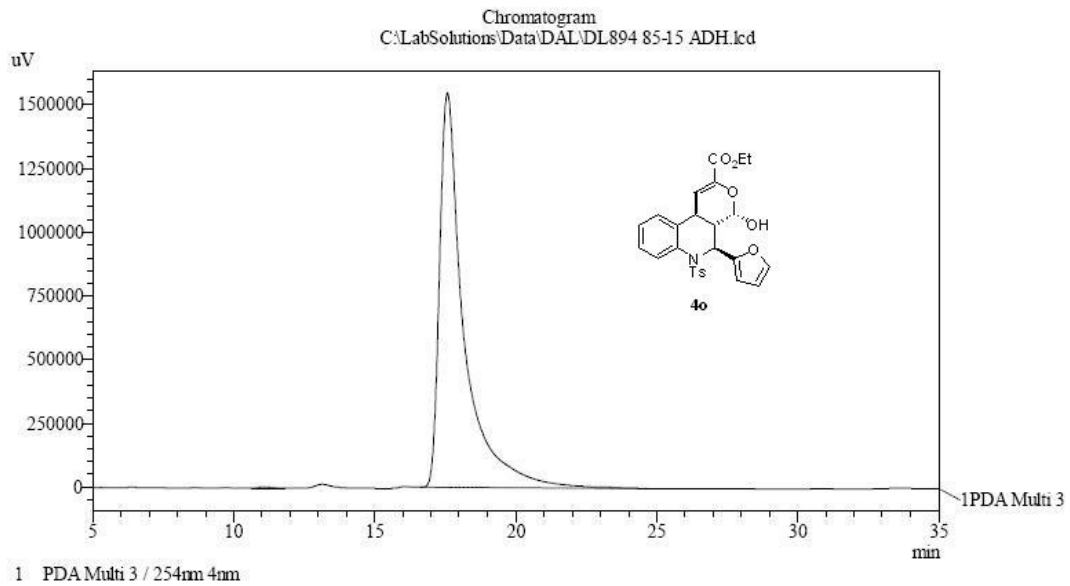

PeakTable

PDA Ch3 254nm 4nm

| Peak# | Ret. Time | Area     | Height  | Area %  |
|-------|-----------|----------|---------|---------|
| 1     | 11.059    | 156880   | 5300    | 0.167   |
| 2     | 17.576    | 94001519 | 1549048 | 99.833  |
| Total |           | 94158399 | 1554349 | 100.000 |



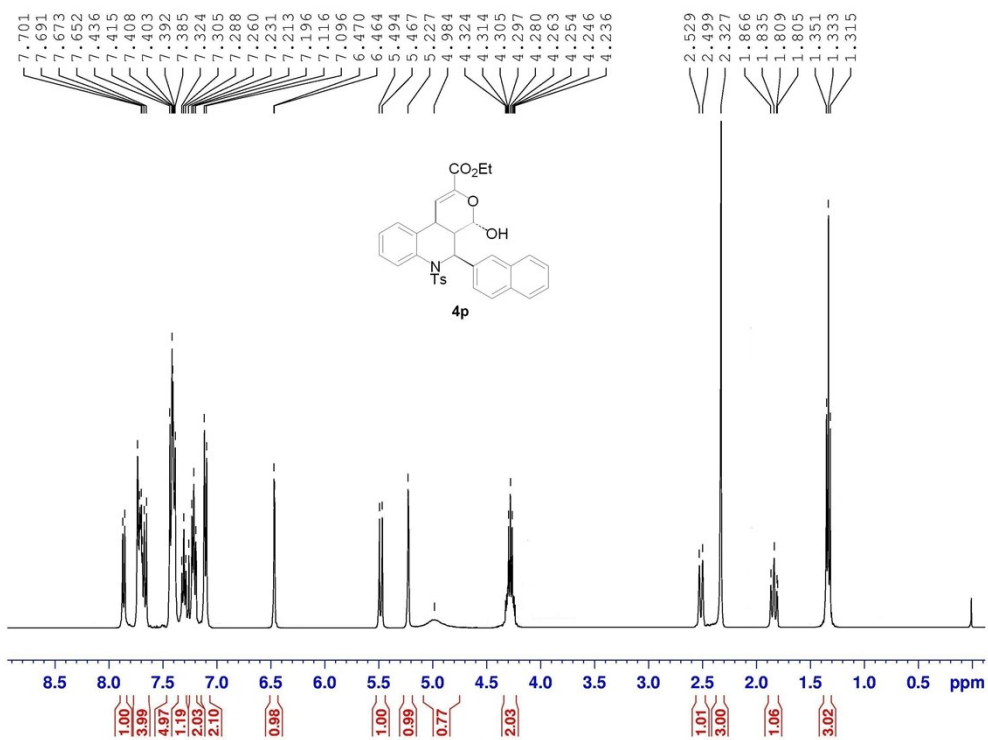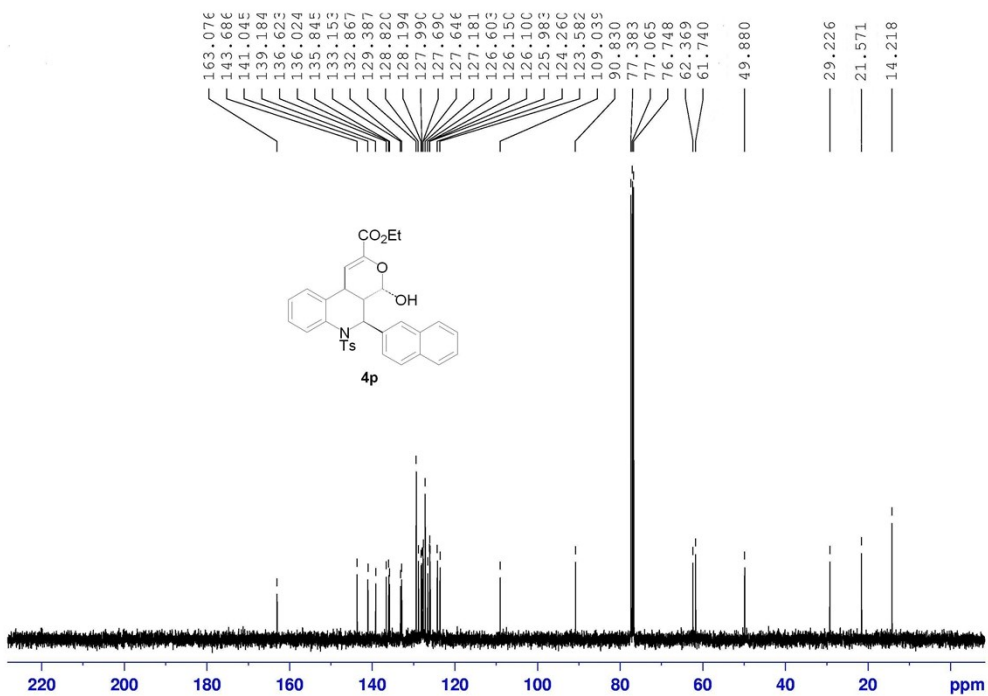

Chromatogram  
C:\LabSolutions\Data\DAL\DL899 85-15 ADH.lcd

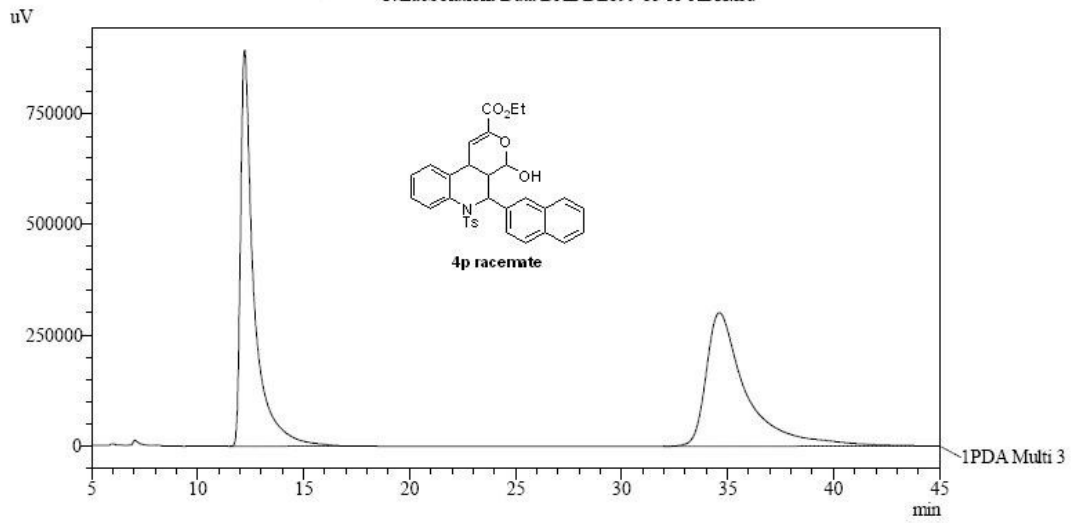

PeakTable

PDA Ch3 254nm 4nm

| Peak# | Ret. Time | Area     | Height  | Area %  |
|-------|-----------|----------|---------|---------|
| 1     | 12.216    | 39231037 | 896084  | 49.710  |
| 2     | 34.616    | 39689266 | 302238  | 50.290  |
| Total |           | 78920303 | 1198321 | 100.000 |

Chromatogram  
C:\LabSolutions\Data\DAL\DL898 85-15 ADH.lcd

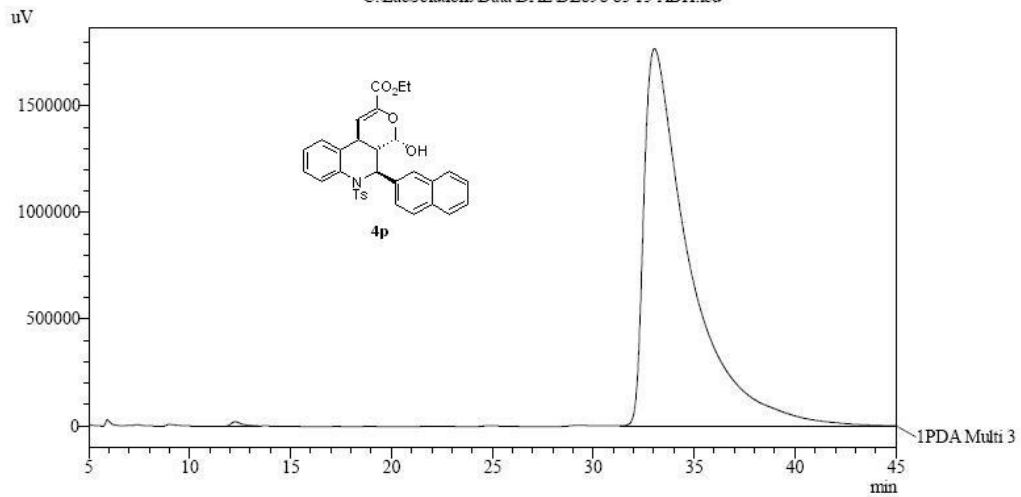

PeakTable

PDA Ch3 254nm 4nm

| Peak# | Ret. Time | Area      | Height  | Area %  |
|-------|-----------|-----------|---------|---------|
| 1     | 12.254    | 800693    | 21189   | 0.290   |
| 2     | 33.042    | 275483765 | 1765879 | 99.710  |
| Total |           | 276284458 | 1787068 | 100.000 |

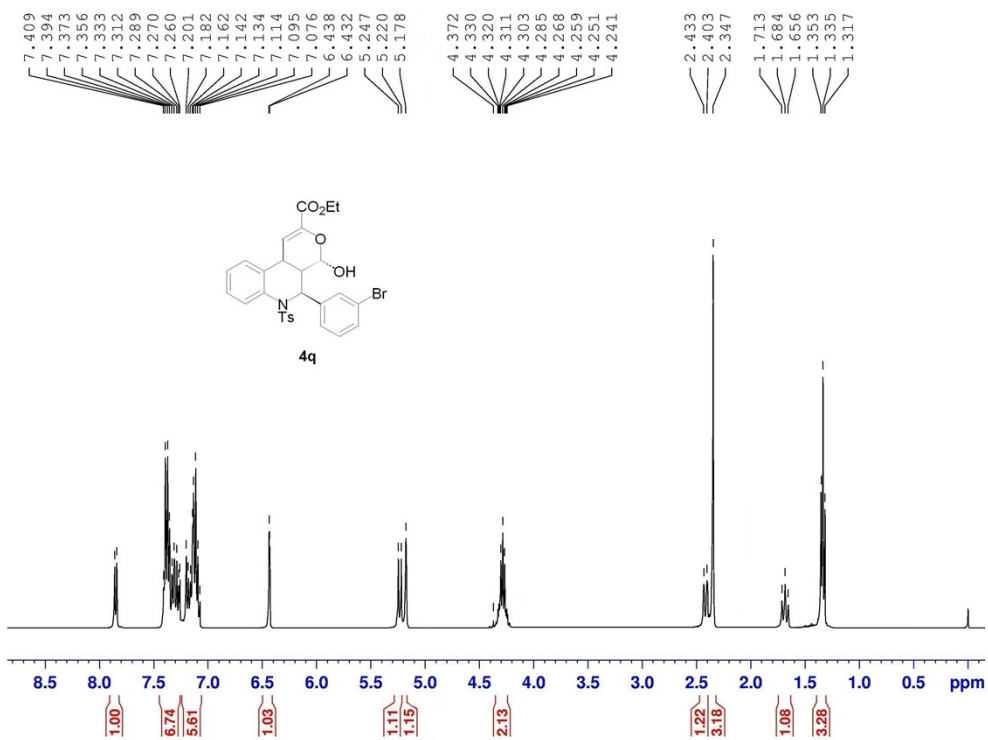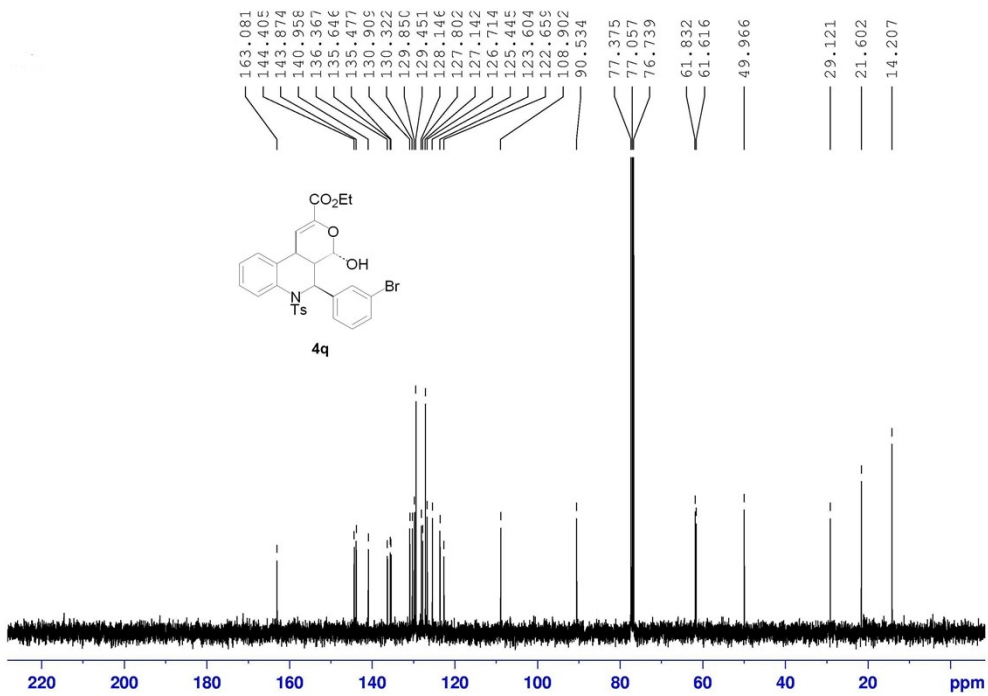

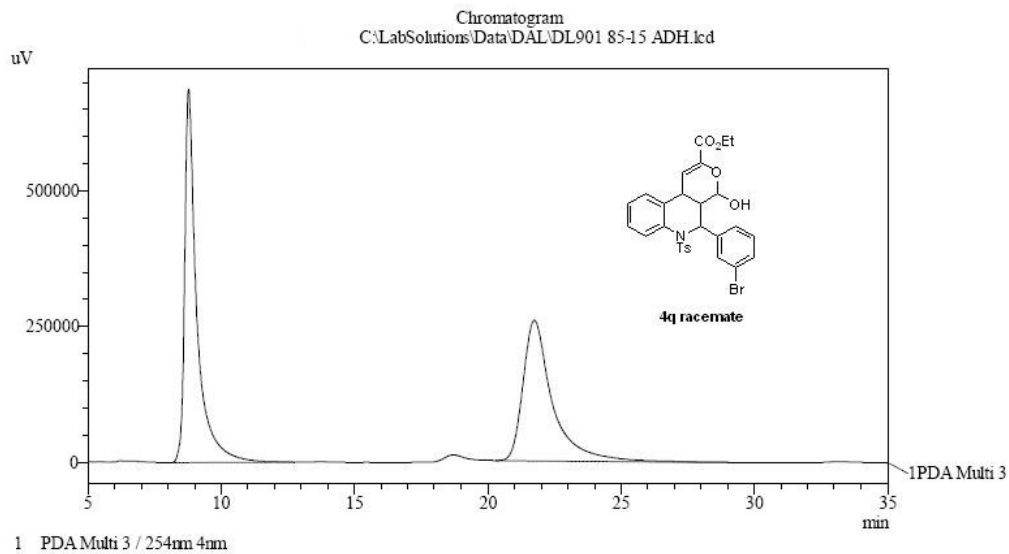

PeakTable

PDA Ch3 254nm 4nm

| Peak# | Ret. Time | Area     | Height | Area %  |
|-------|-----------|----------|--------|---------|
| 1     | 8.776     | 21866107 | 687654 | 52.410  |
| 2     | 21.743    | 19855334 | 258851 | 47.590  |
| Total |           | 41721441 | 946505 | 100.000 |

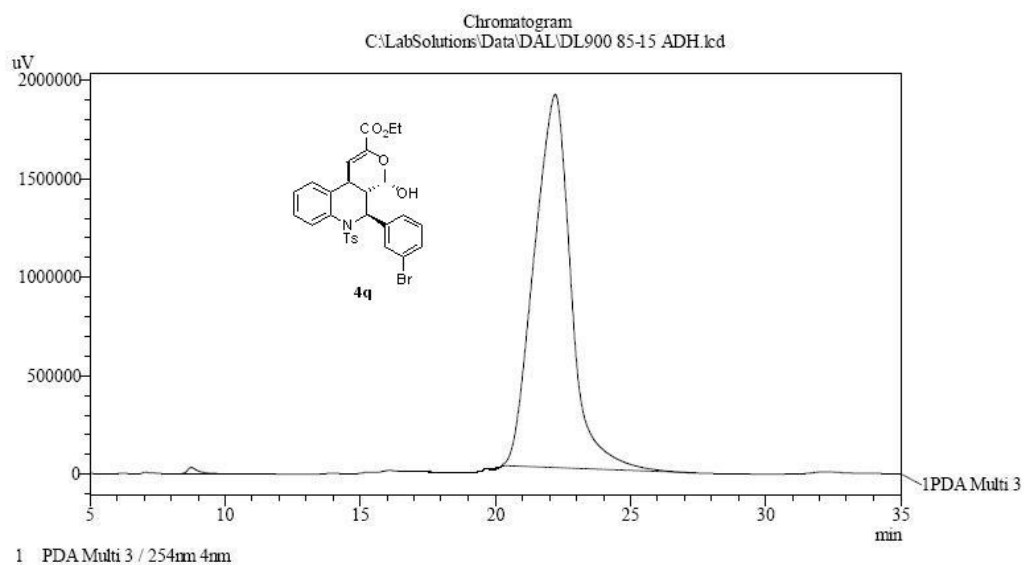

PeakTable

PDA Ch3 254nm 4nm

| Peak# | Ret. Time | Area      | Height  | Area %  |
|-------|-----------|-----------|---------|---------|
| 1     | 8.748     | 959726    | 32661   | 0.532   |
| 2     | 22.216    | 179366639 | 1895011 | 99.468  |
| Total |           | 180326365 | 1927672 | 100.000 |

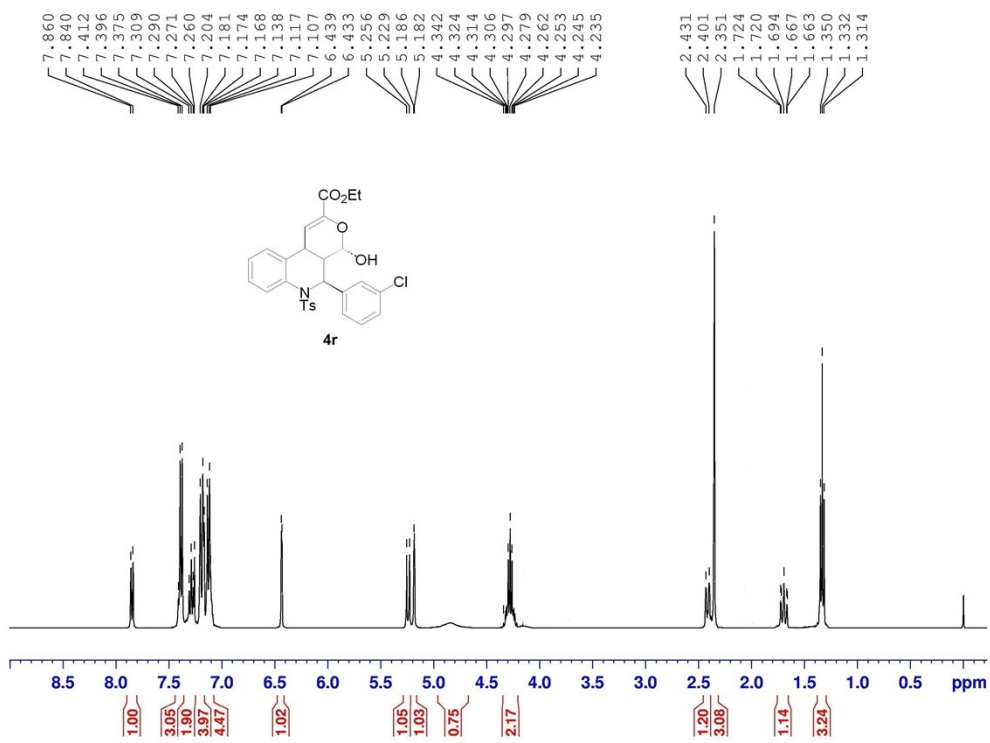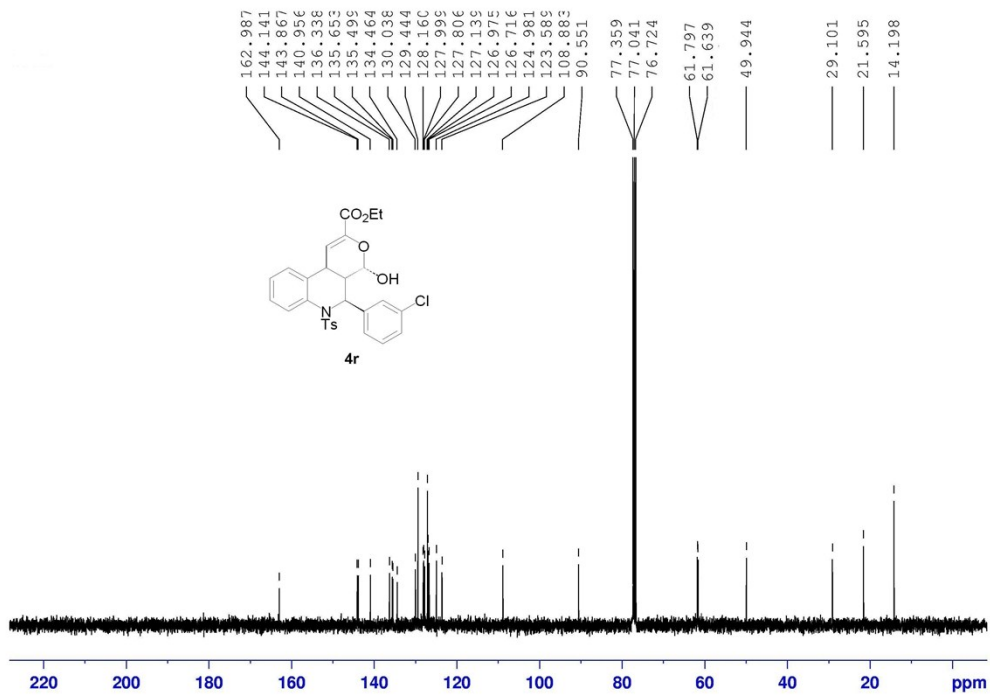

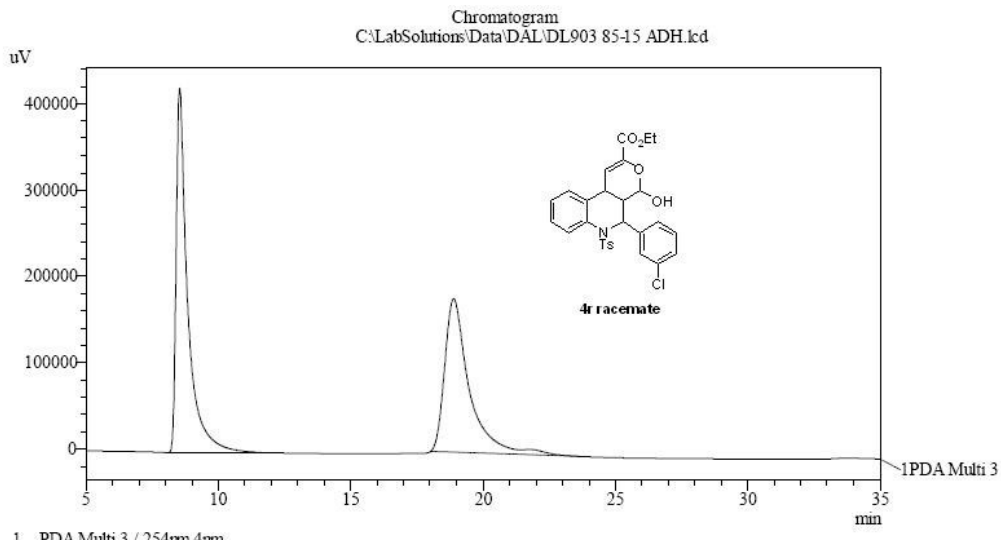

PeakTable

PDA Ch3 254nm 4nm

| Peak# | Ret. Time | Area     | Height | Area %  |
|-------|-----------|----------|--------|---------|
| 1     | 8.538     | 12811214 | 422466 | 52.675  |
| 2     | 18.887    | 11509876 | 177573 | 47.325  |
| Total |           | 24321090 | 600038 | 100.000 |

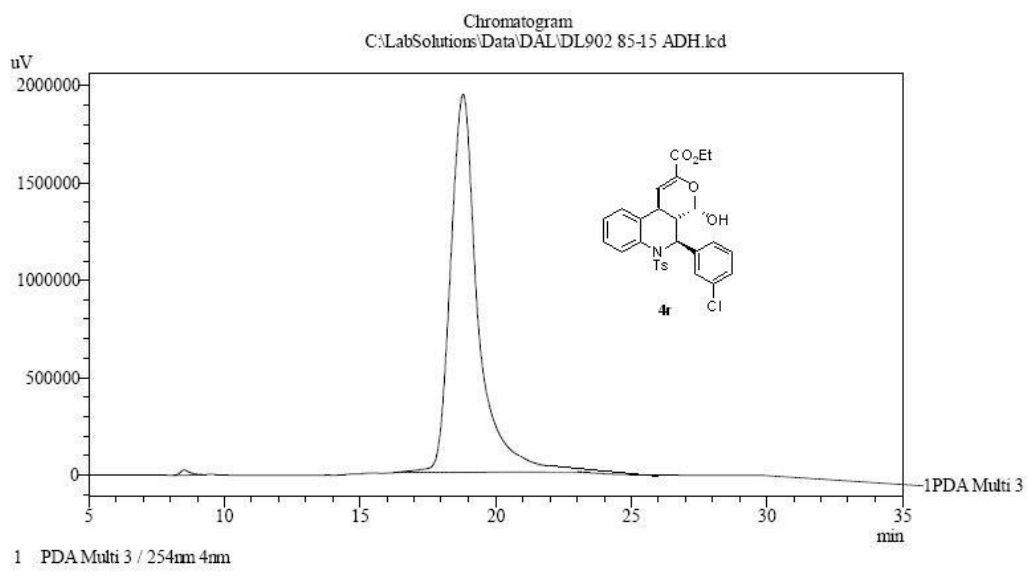

PeakTable

PDA Ch3 254nm 4nm

| Peak# | Ret. Time | Area      | Height  | Area %  |
|-------|-----------|-----------|---------|---------|
| 1     | 8.509     | 646207    | 26241   | 0.463   |
| 2     | 18.801    | 138963241 | 1939854 | 99.537  |
| Total |           | 139609448 | 1966095 | 100.000 |

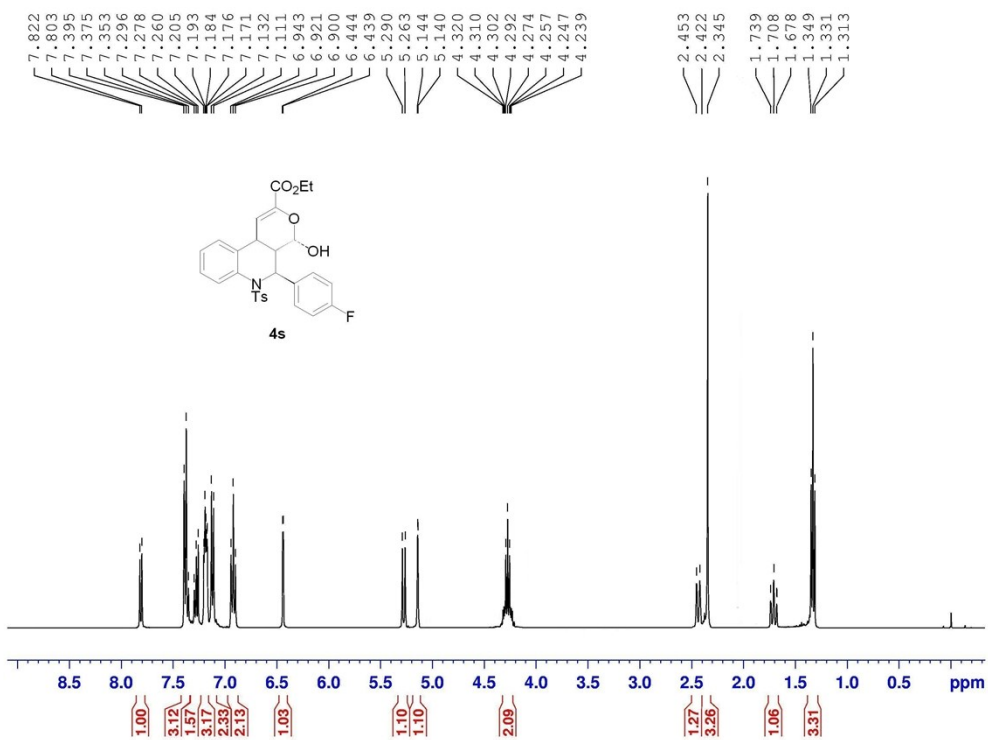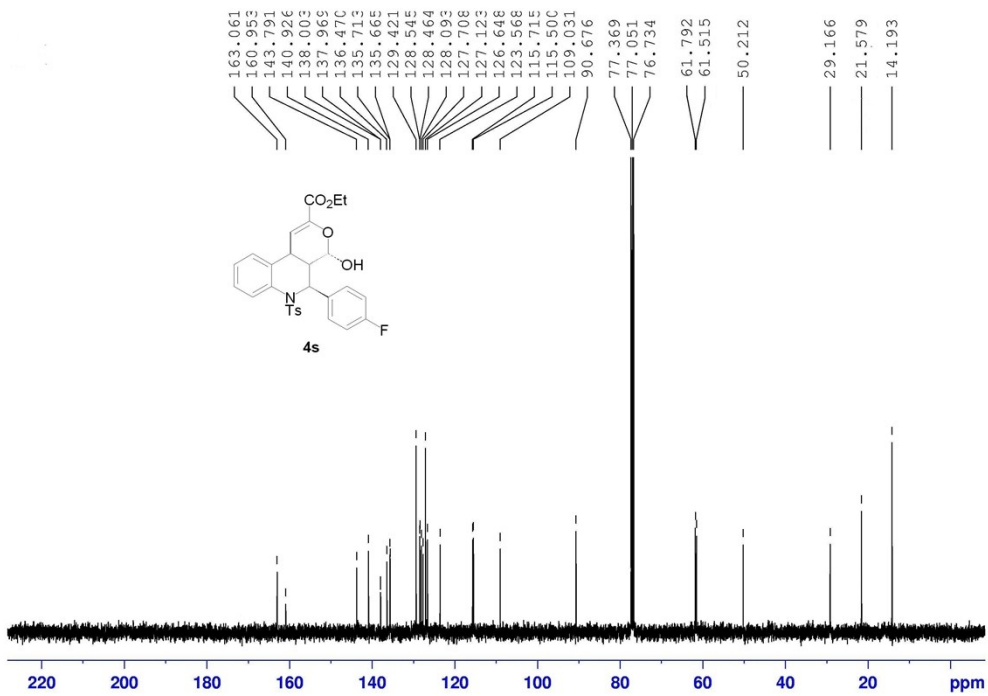

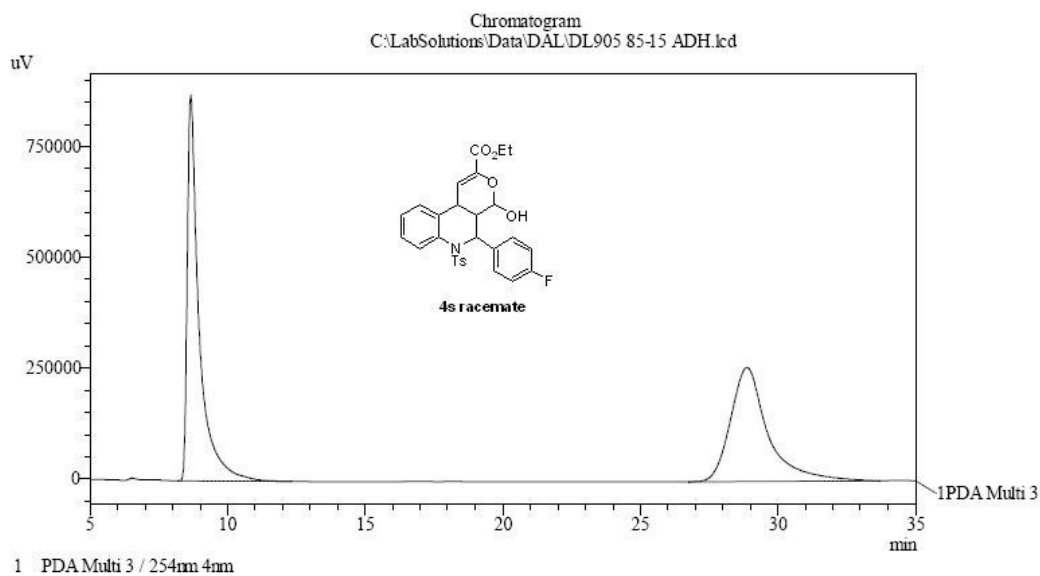

PeakTable

PDA Ch3 254nm 4mm

| Peak# | Ret. Time | Area     | Height  | Area %  |
|-------|-----------|----------|---------|---------|
| 1     | 8.659     | 26257762 | 870744  | 52.074  |
| 2     | 28.871    | 24166532 | 257202  | 47.926  |
| Total |           | 50424294 | 1127946 | 100.000 |

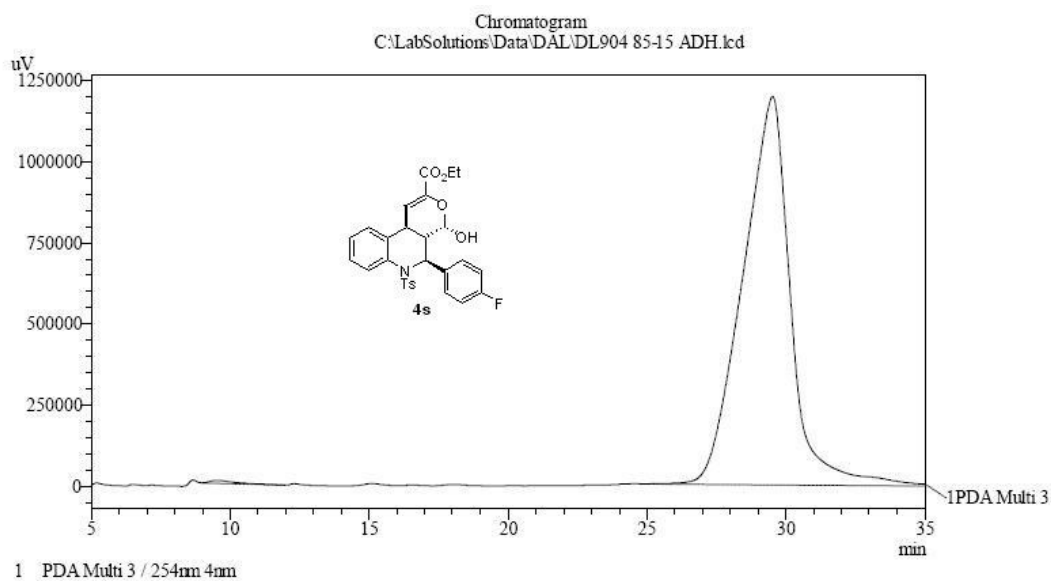

PeakTable

PDA Ch3 254nm 4mm

| Peak# | Ret. Time | Area      | Height  | Area %  |
|-------|-----------|-----------|---------|---------|
| 1     | 9.504     | 553293    | 8934    | 0.385   |
| 2     | 29.514    | 143036831 | 1196088 | 99.615  |
| Total |           | 143590124 | 1205023 | 100.000 |
